# Supplementary material for: Fluorescently labeled xylosides offer insight into the biosynthetic pathways of glycosaminoglycans
Source: Royal Society of Chemistry journal article supplement (doi:10.1039/d1ra06320k), 2021-01-01
Supplement: d1ra06320k1.pdf [file d1ra06320k1.pdf]

## Supporting Information

### Fluorescently labeled xylosides offer insight into the biosynthetic pathways of glycosaminoglycans.

Roberto Mastio<sup>1</sup>, Daniel Willén<sup>1</sup>, Zackarias Söderlund<sup>2</sup>, Gunilla Westergren-Thorsson<sup>2</sup>,  
Sophie Manner<sup>1</sup>, Emil Tykesson<sup>2</sup>, Ulf Ellervik<sup>1,2\*</sup>

<sup>1</sup>Centre for Analysis and Synthesis, Centre for Chemistry and Chemical Engineering, Lund University, P.O. Box 124, SE-221 00 Lund, Sweden.

<sup>2</sup>Department of Experimental Medical Science, Lund University, P.O. Box 117, SE-221 00 Lund, Sweden

\* Corresponding author. *E-mail address:* [ulf.ellervik@chem.lu.se](mailto:ulf.ellervik@chem.lu.se).

- |                                                       |        |
|-------------------------------------------------------|--------|
| 1. Chromatographic analysis                           | S2-S3  |
| 2. <sup>1</sup> H-NMR and <sup>13</sup> C-NMR spectra | S4-S23 |

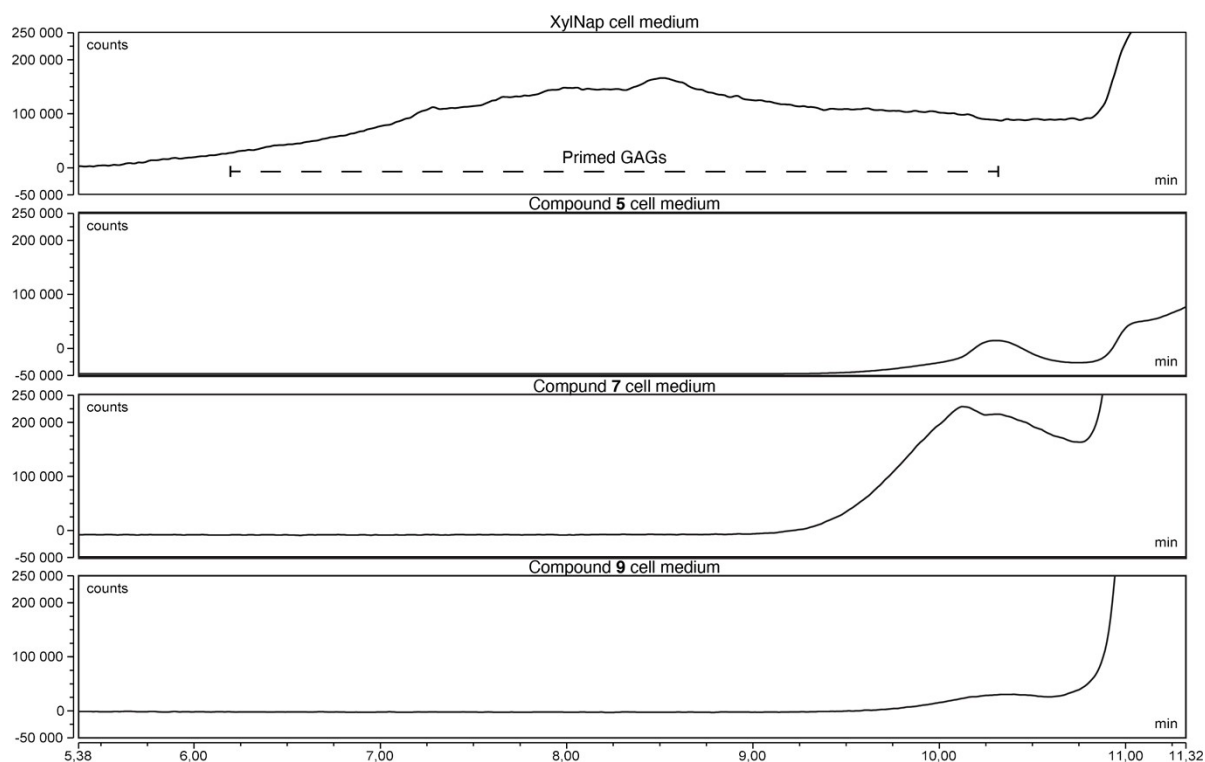

**Supplementary Figure 1.** Size-exclusion chromatography analysis of conditioned medium from A549 cells treated with 0.1 mM XylNap, 5, 7 or 9. Fluorescence was monitored at 229/372 (Ex./Em.) for XylNap and 410/455 (Ex./Em.) for PacBlue compounds.

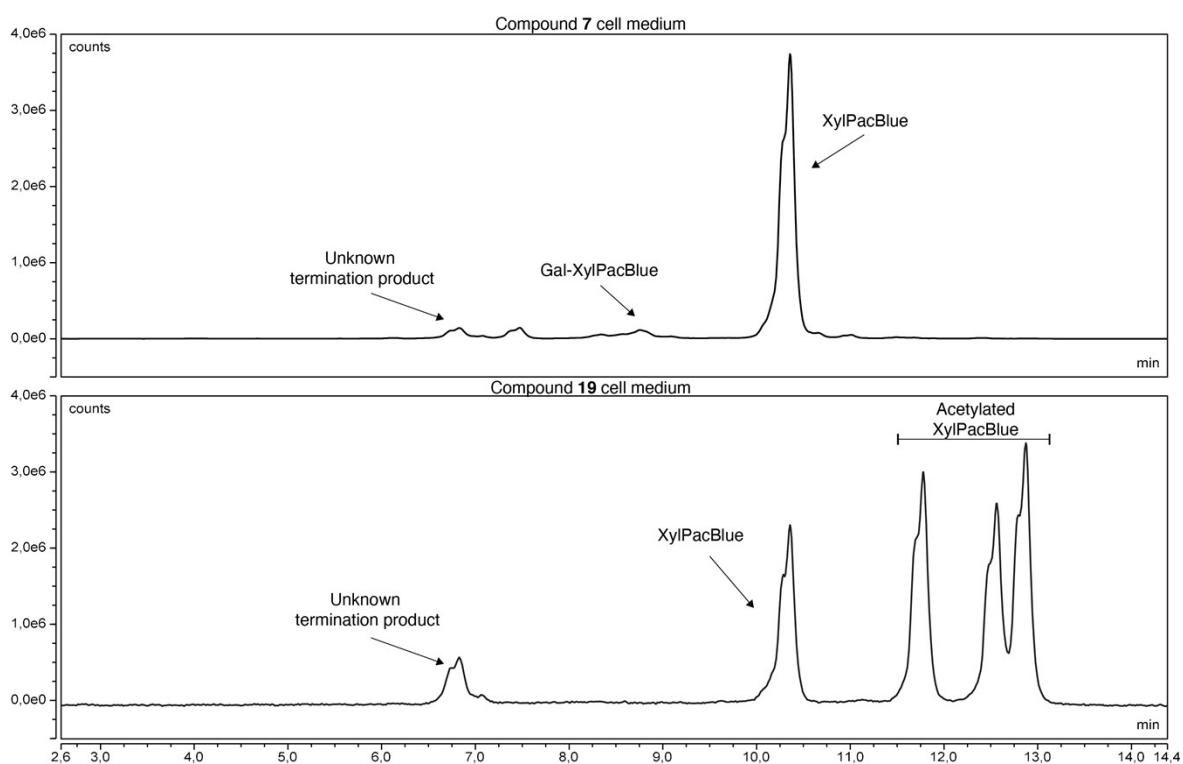

**Supplementary Figure 2.** Reversed-phase chromatography analysis of products secreted by A549 cells after stimulation with 0.1 mM non-acetylated (top, 7) or fully acetylated (bottom, 19) compound.

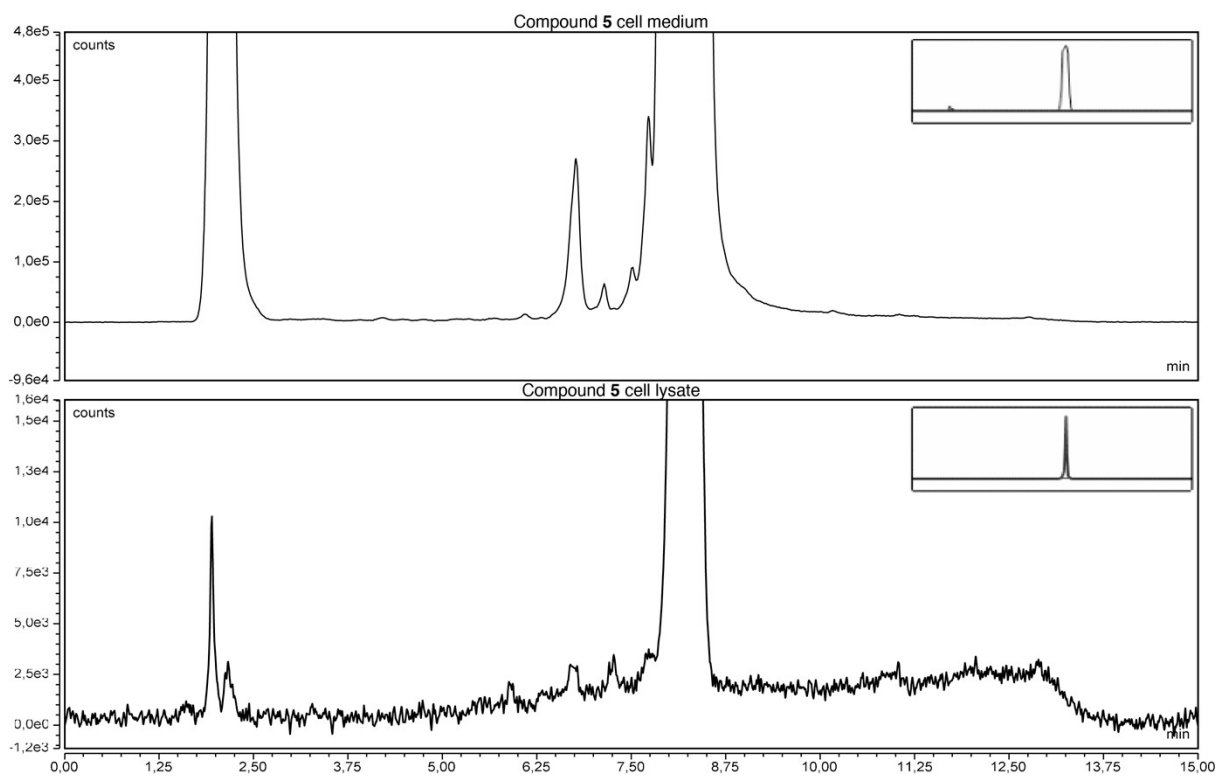

**Supplementary Figure 3.** Reversed-phase chromatography analysis of conditioned medium and cell lysate from A549 cells treated with 0.1 mM **5**.

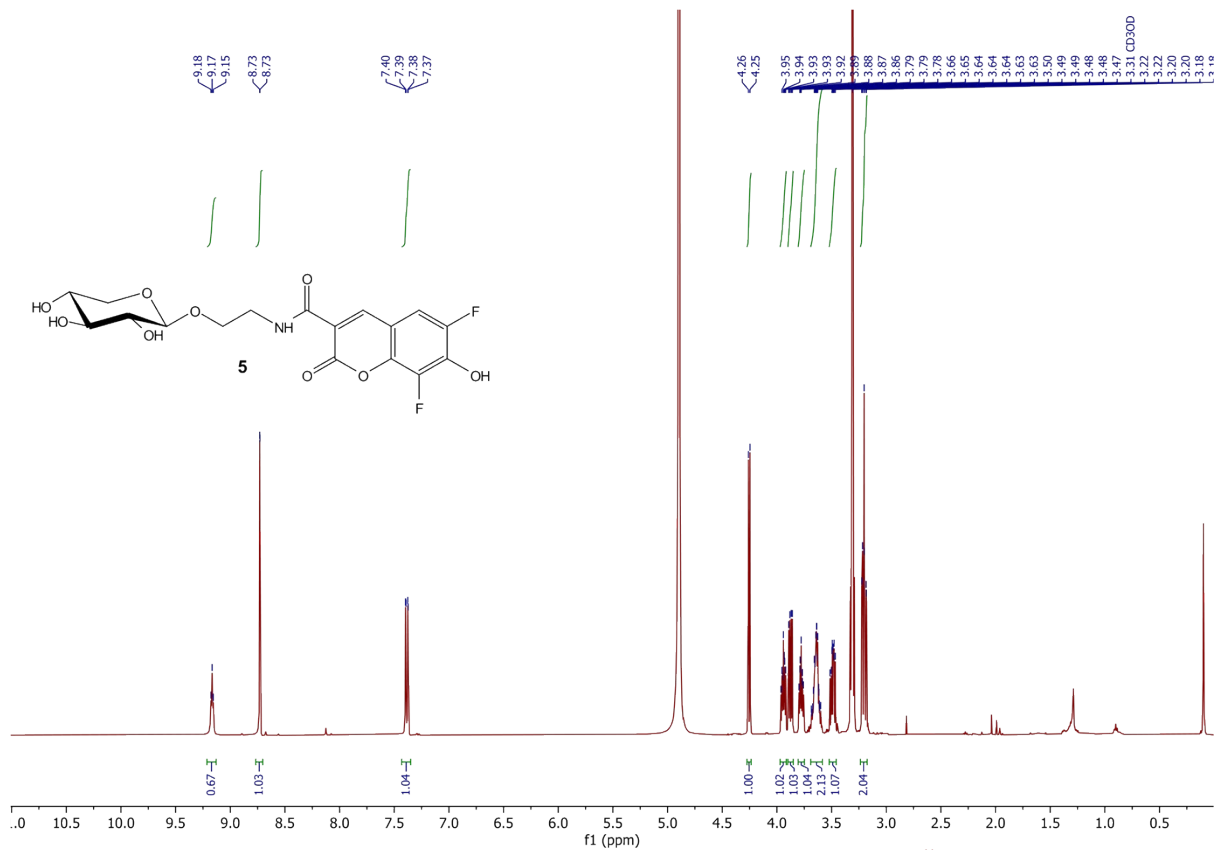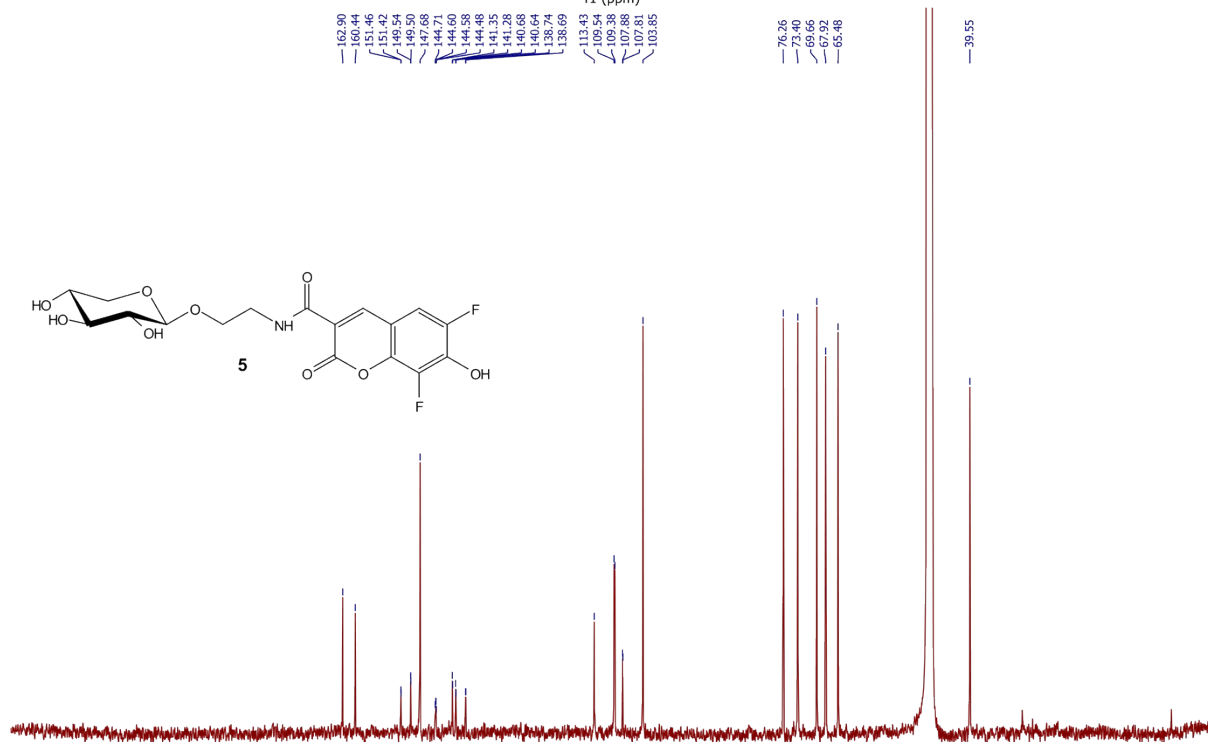

Figure S5 – <sup>1</sup>H and <sup>13</sup>C spectrum for compound 5

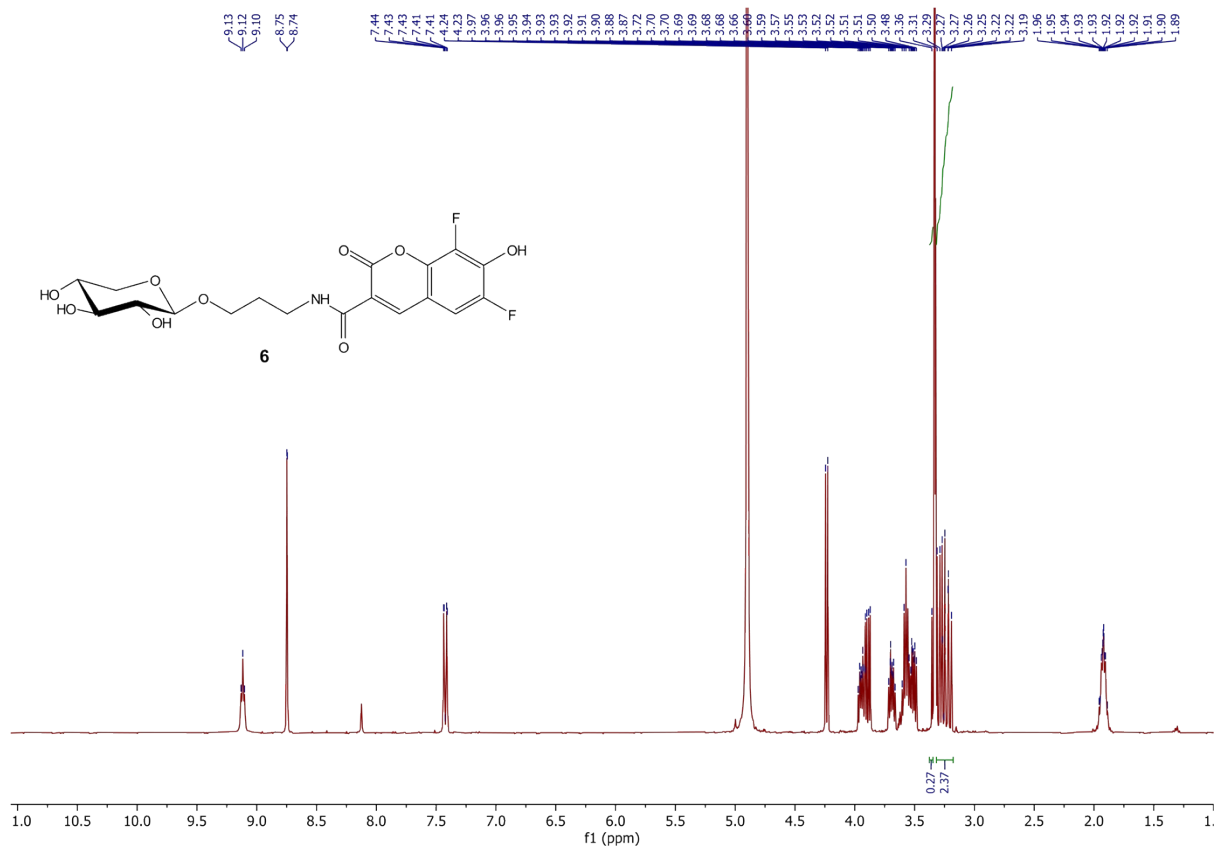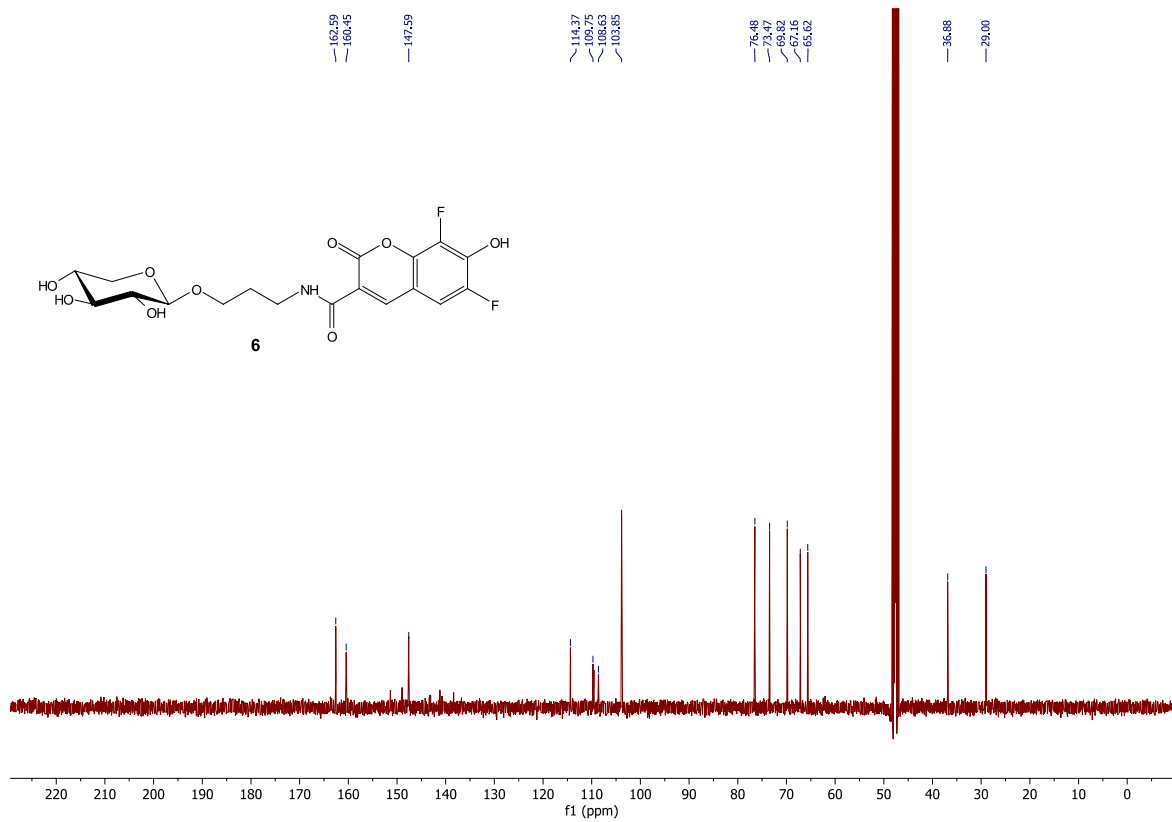

Figure S6 –  $^1\text{H}$  and  $^{13}\text{C}$  spectrum for compound 6

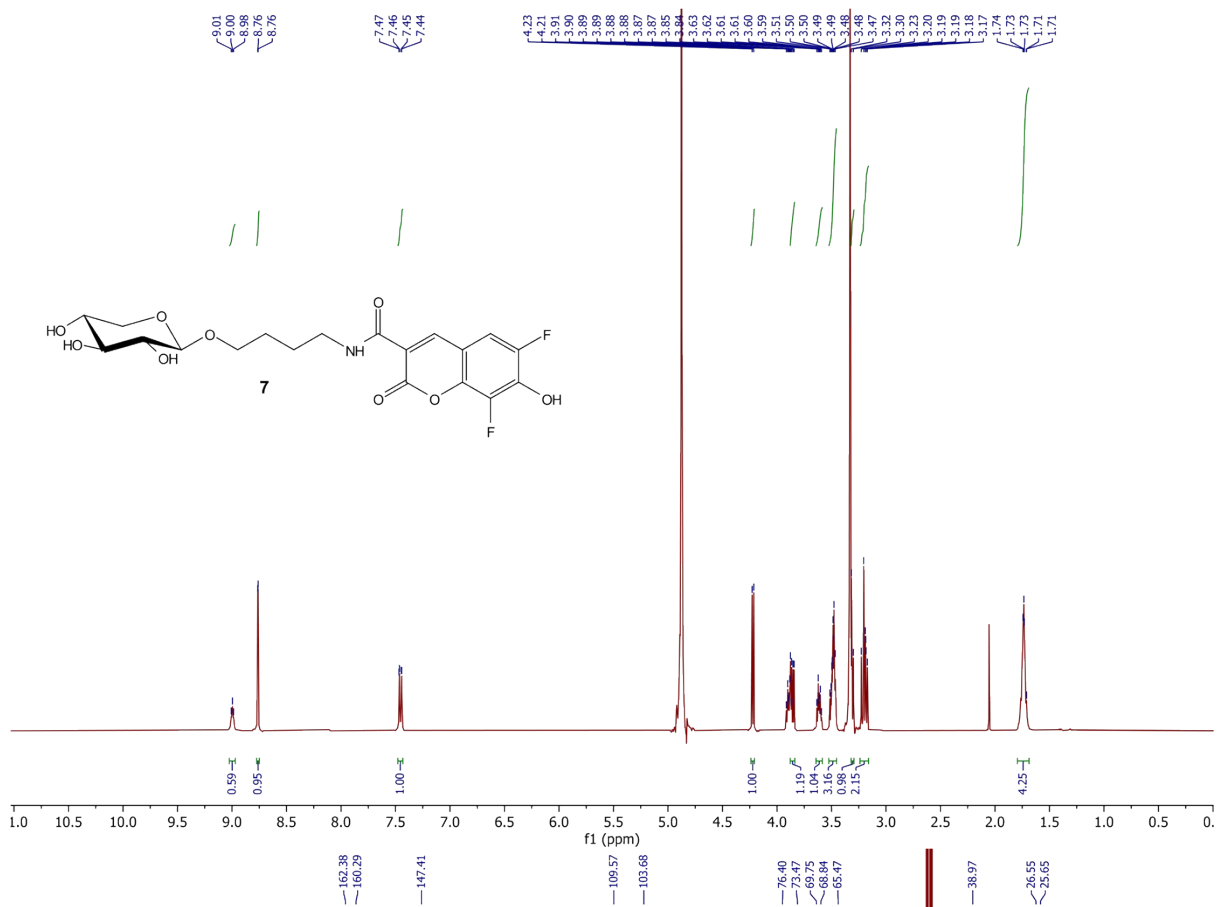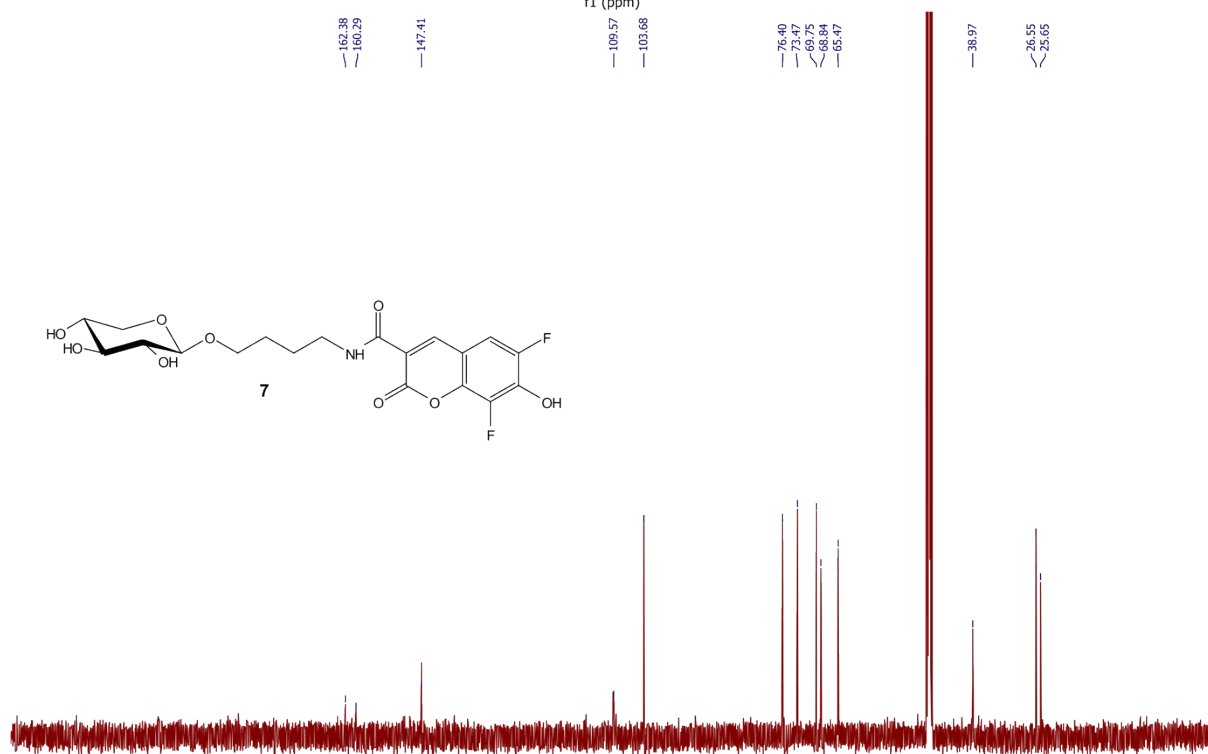

Figure S7 – <sup>1</sup>H and <sup>13</sup>C spectrum for compound 7

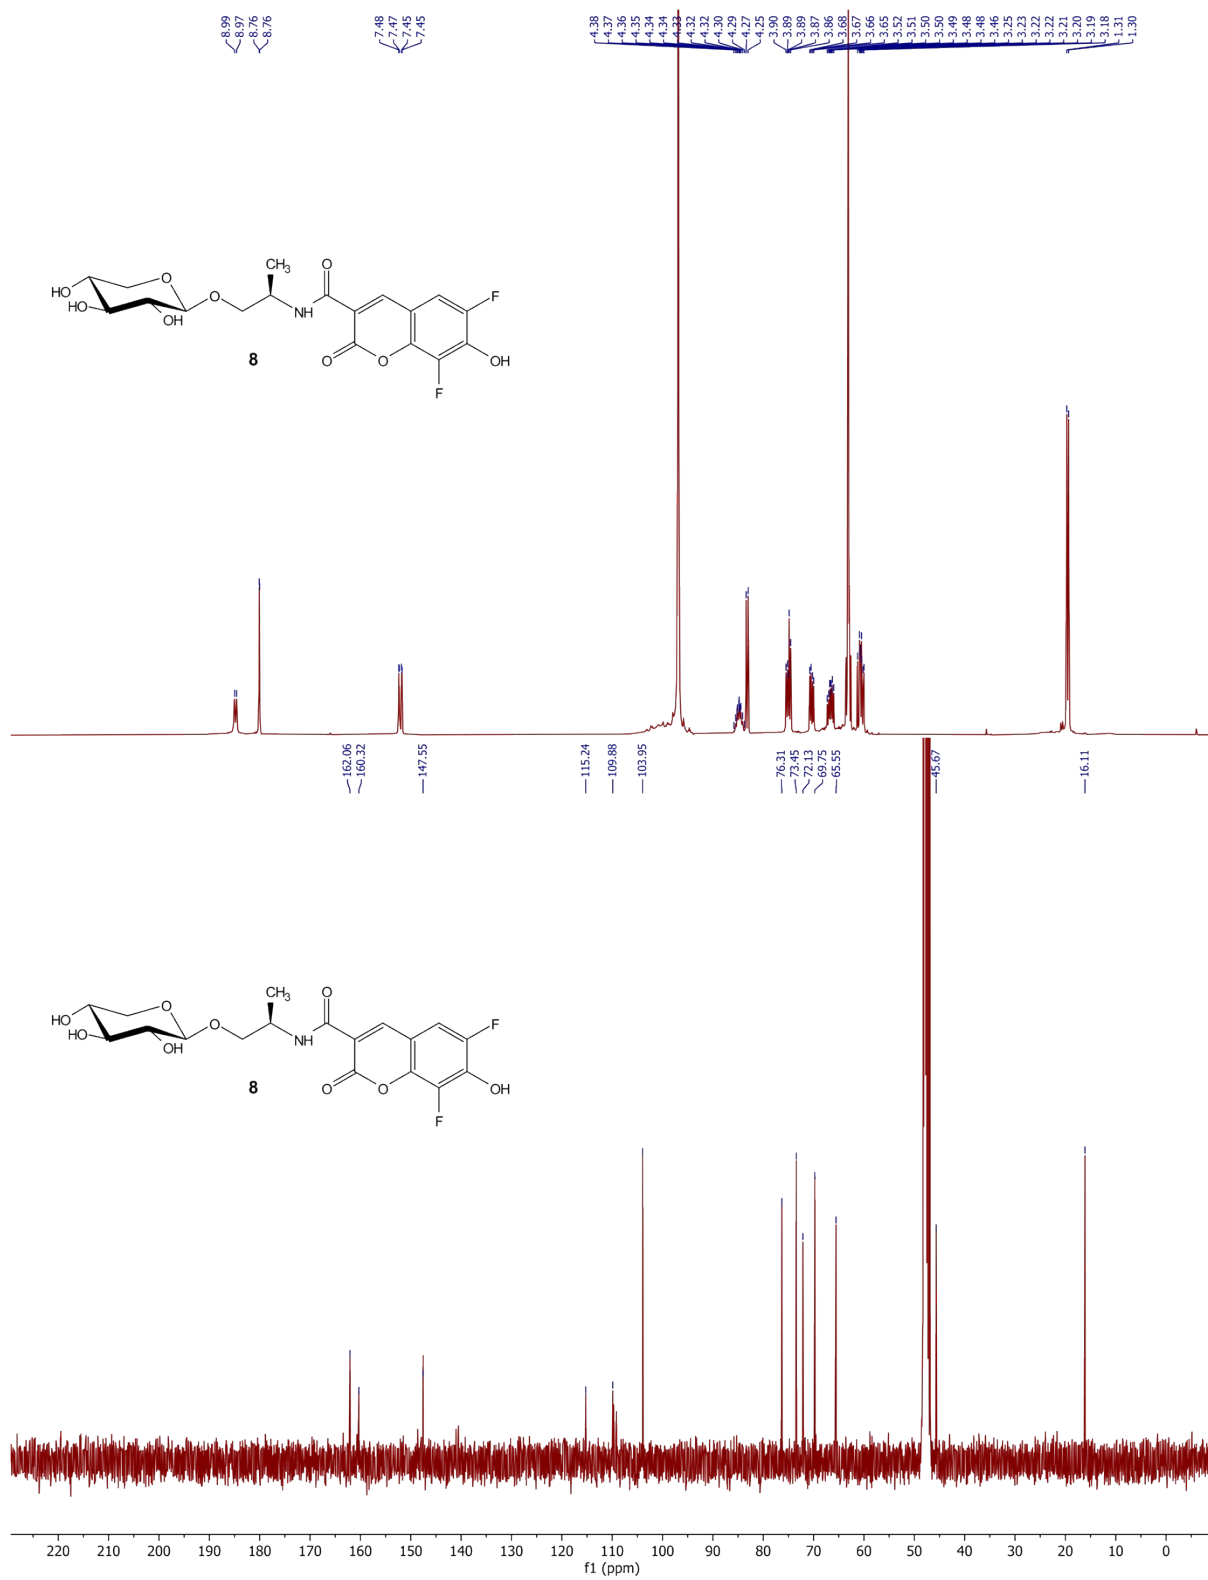

Figure S8 – <sup>1</sup>H and <sup>13</sup>C spectrum for compound 8

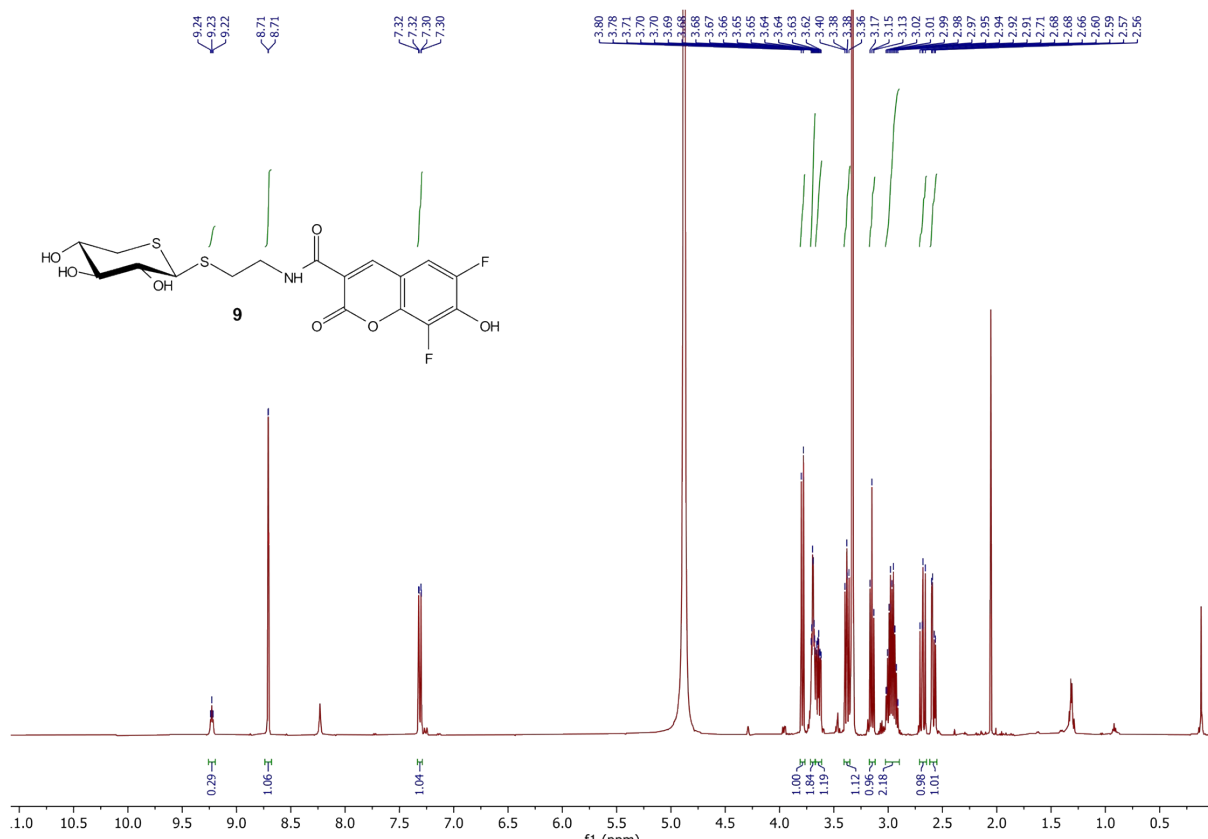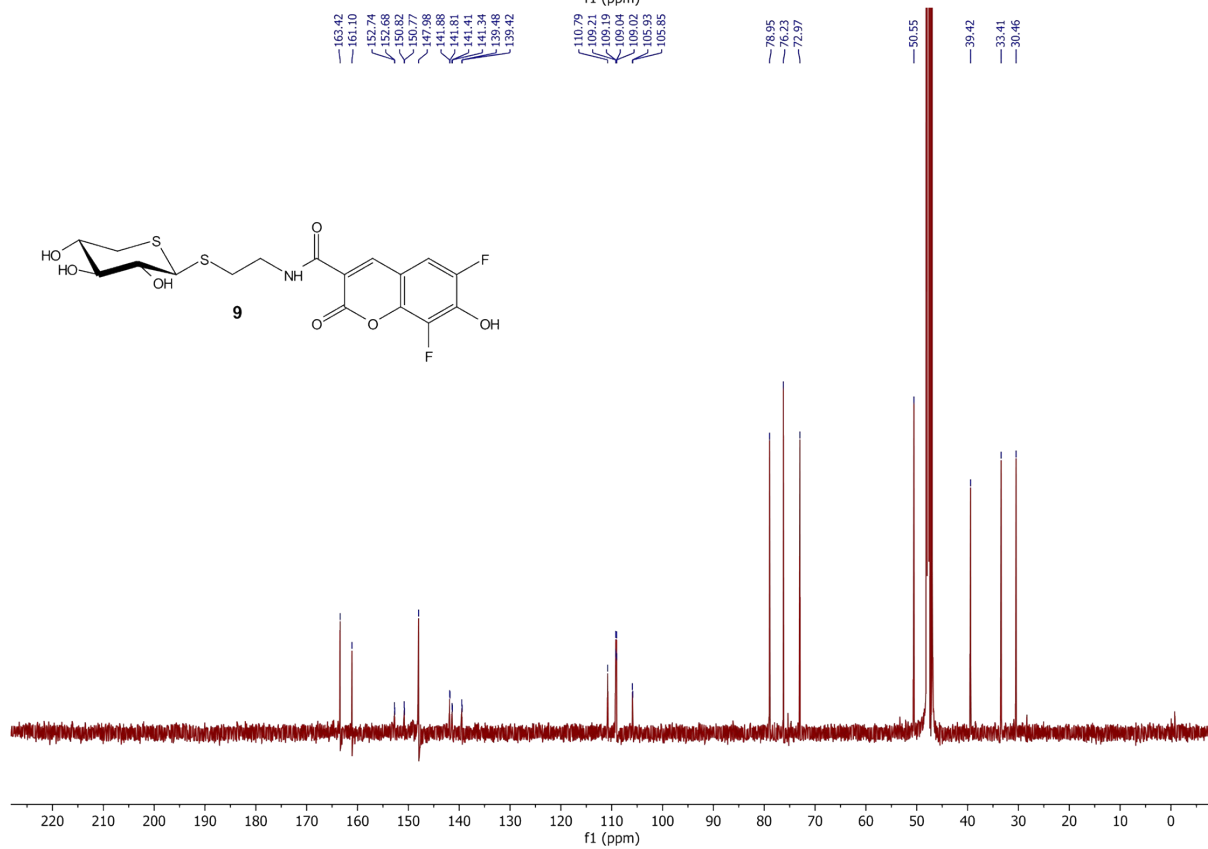

Figure S9 – <sup>1</sup>H and <sup>13</sup>C spectrum for compound 9



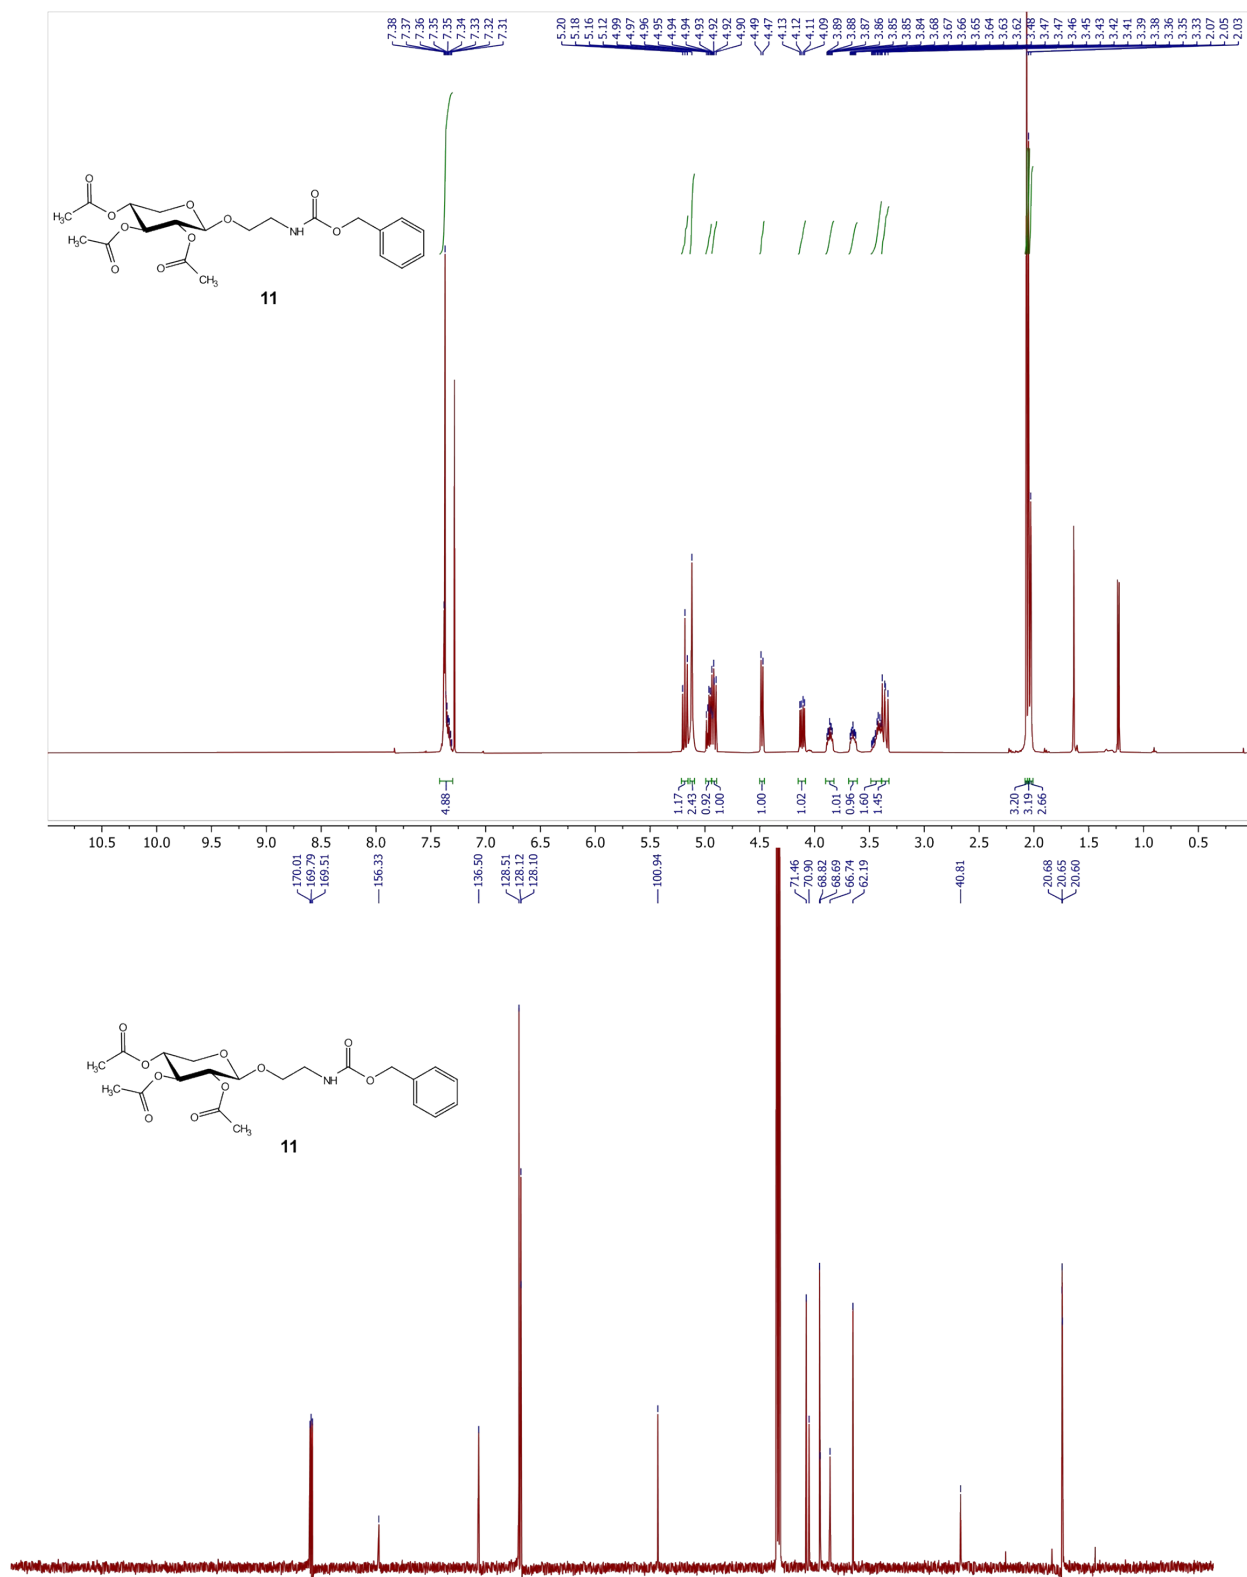

Figure S10 – <sup>1</sup>H and <sup>13</sup>C spectrum for compound 11

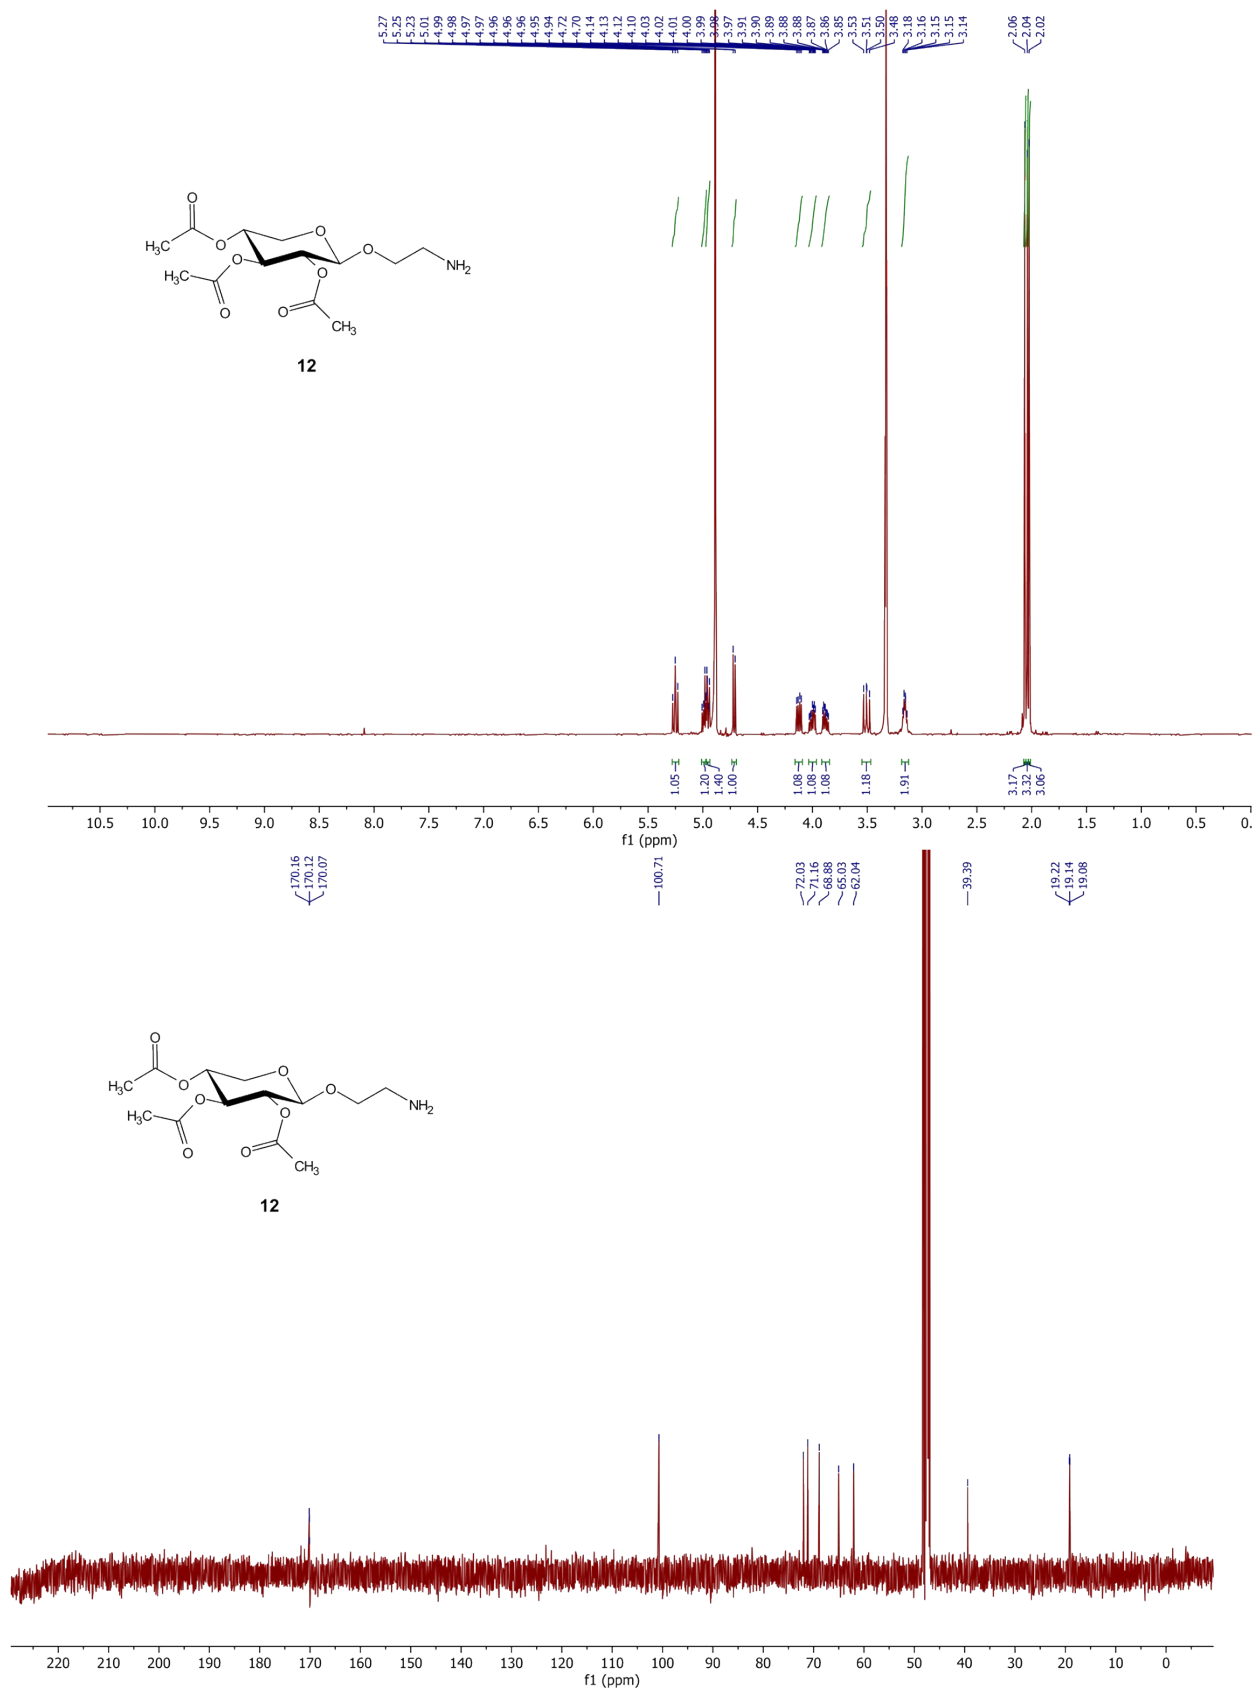

Figure S11 – <sup>1</sup>H and <sup>13</sup>C spectrum for compound 12

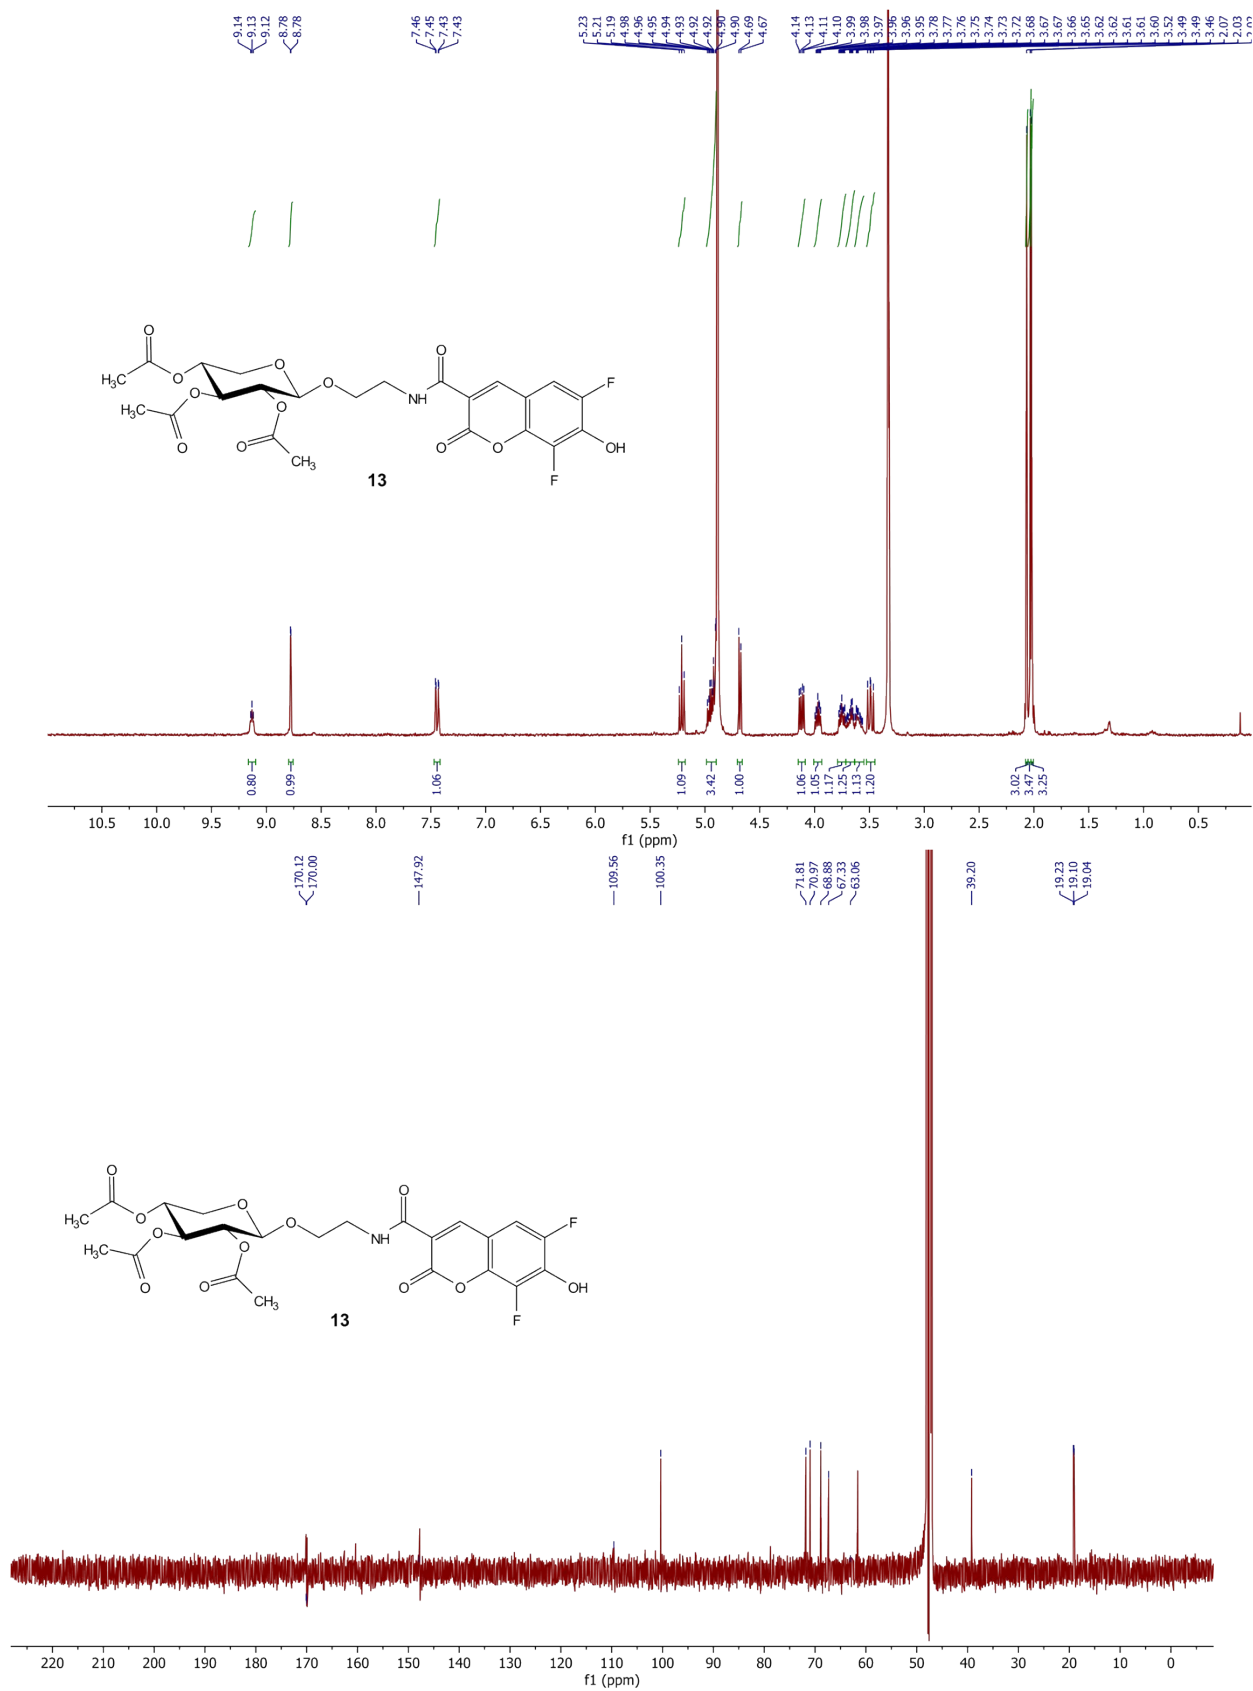

Figure S12 – <sup>1</sup>H and <sup>13</sup>C spectrum for compound 13

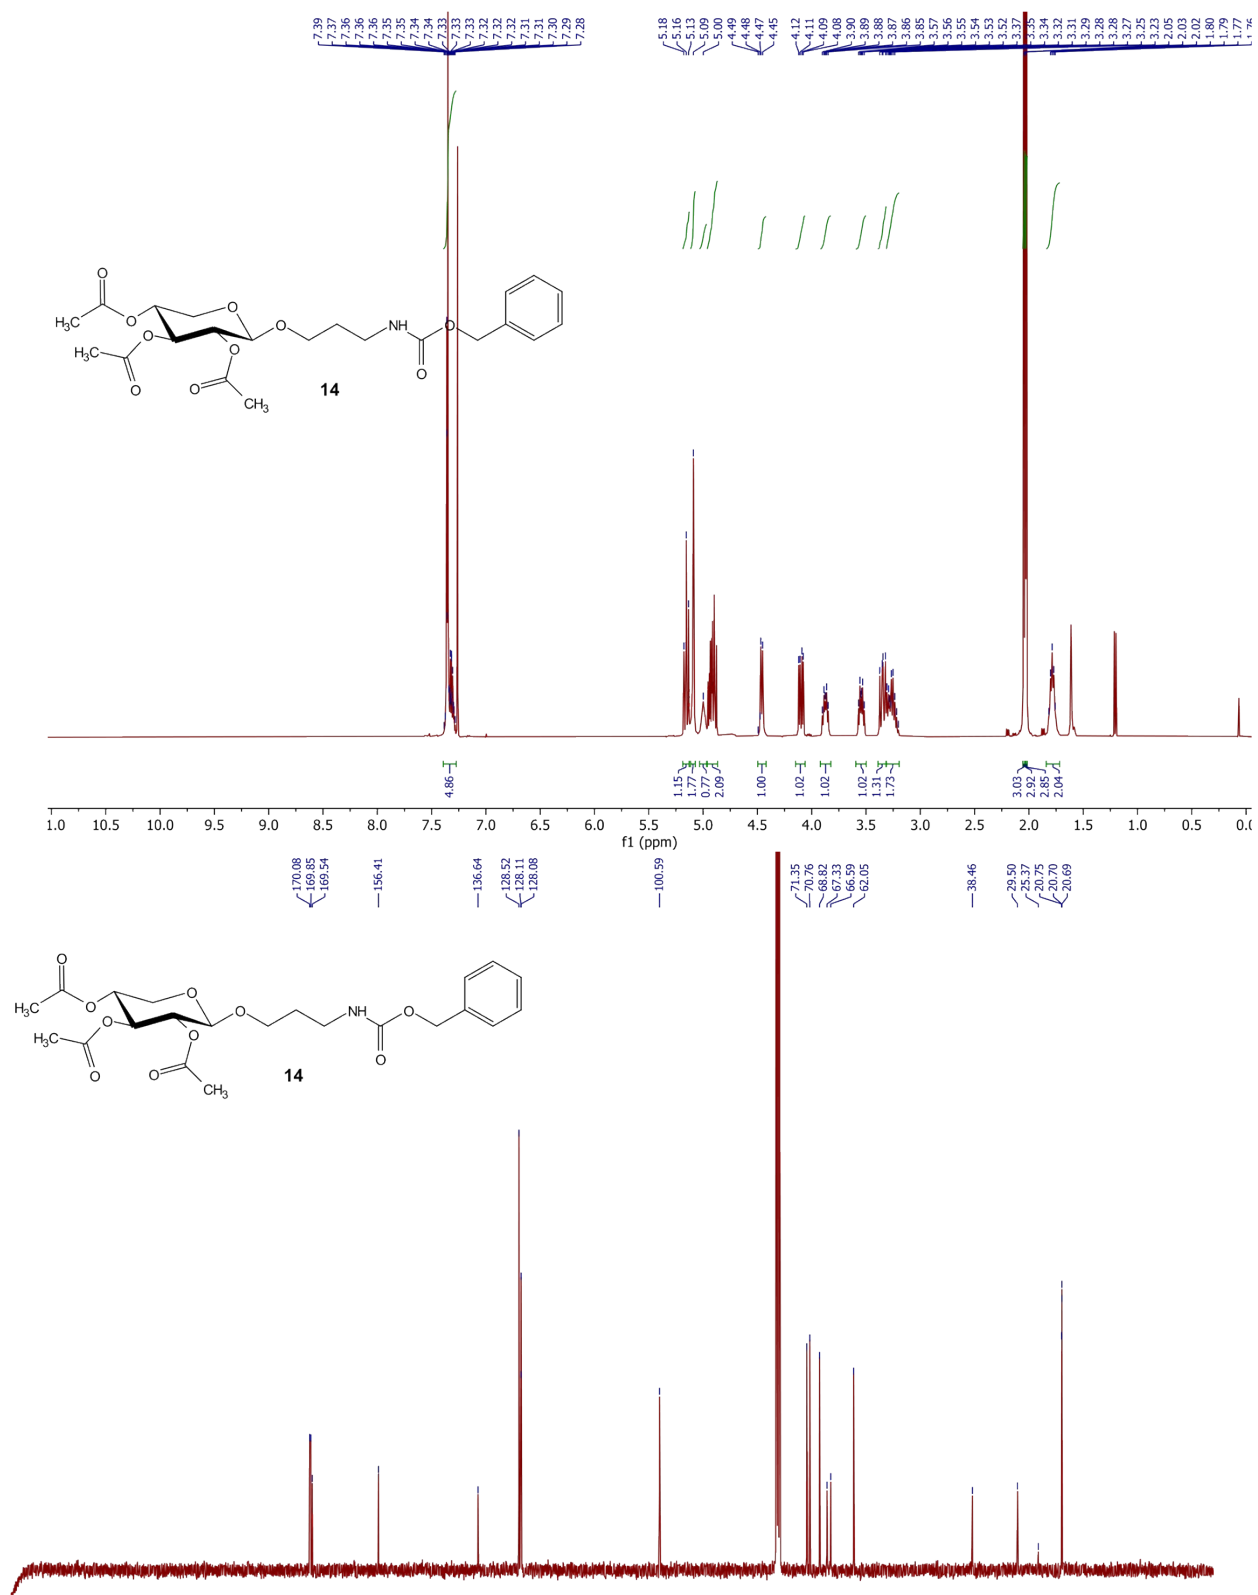

Figure S13 – <sup>1</sup>H and <sup>13</sup>C spectrum for compound 14

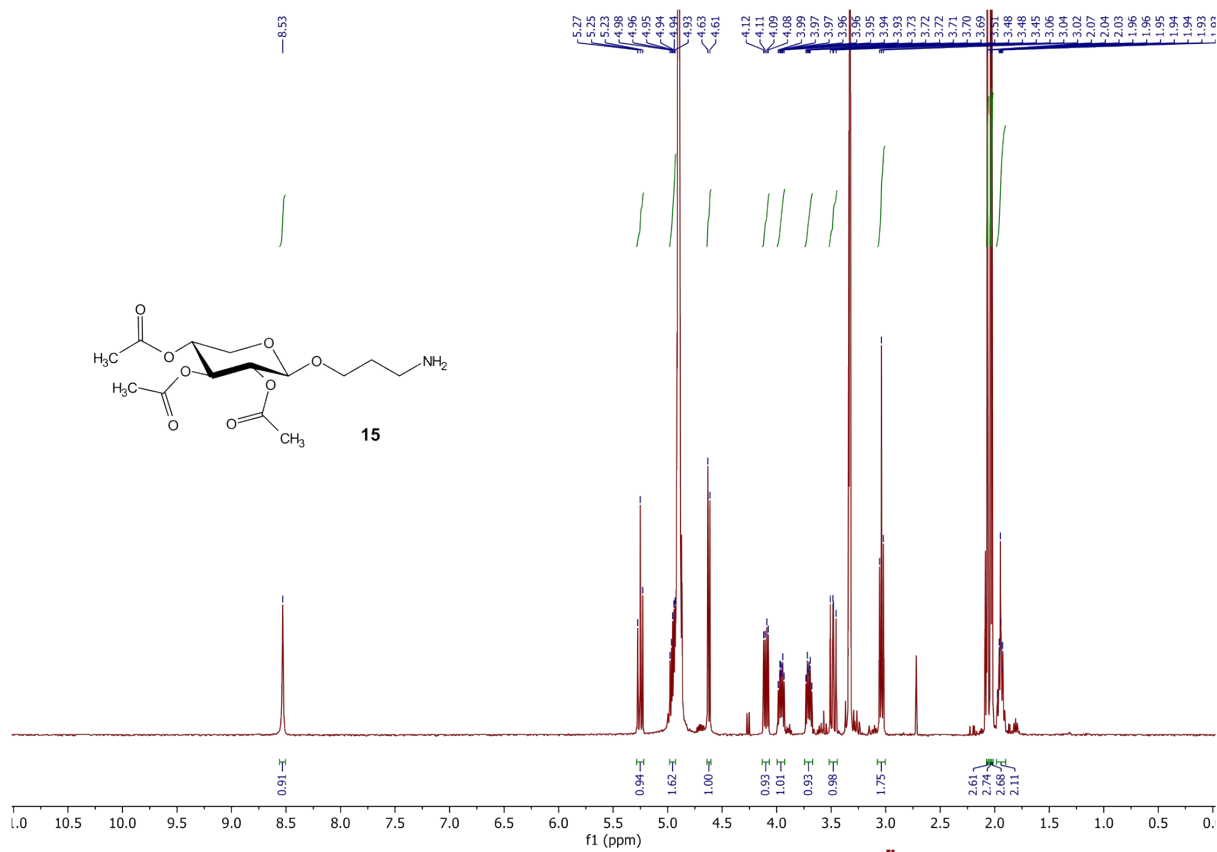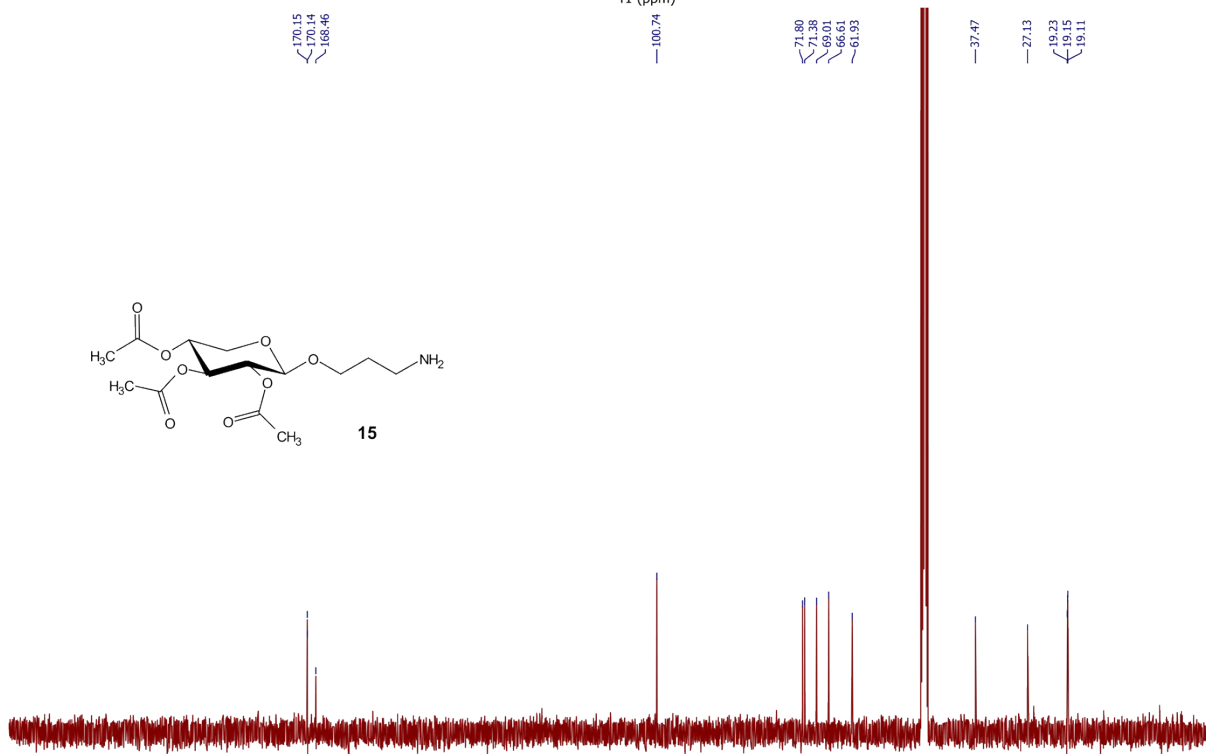

Figure S14 – <sup>1</sup>H and <sup>13</sup>C spectrum for compound 15

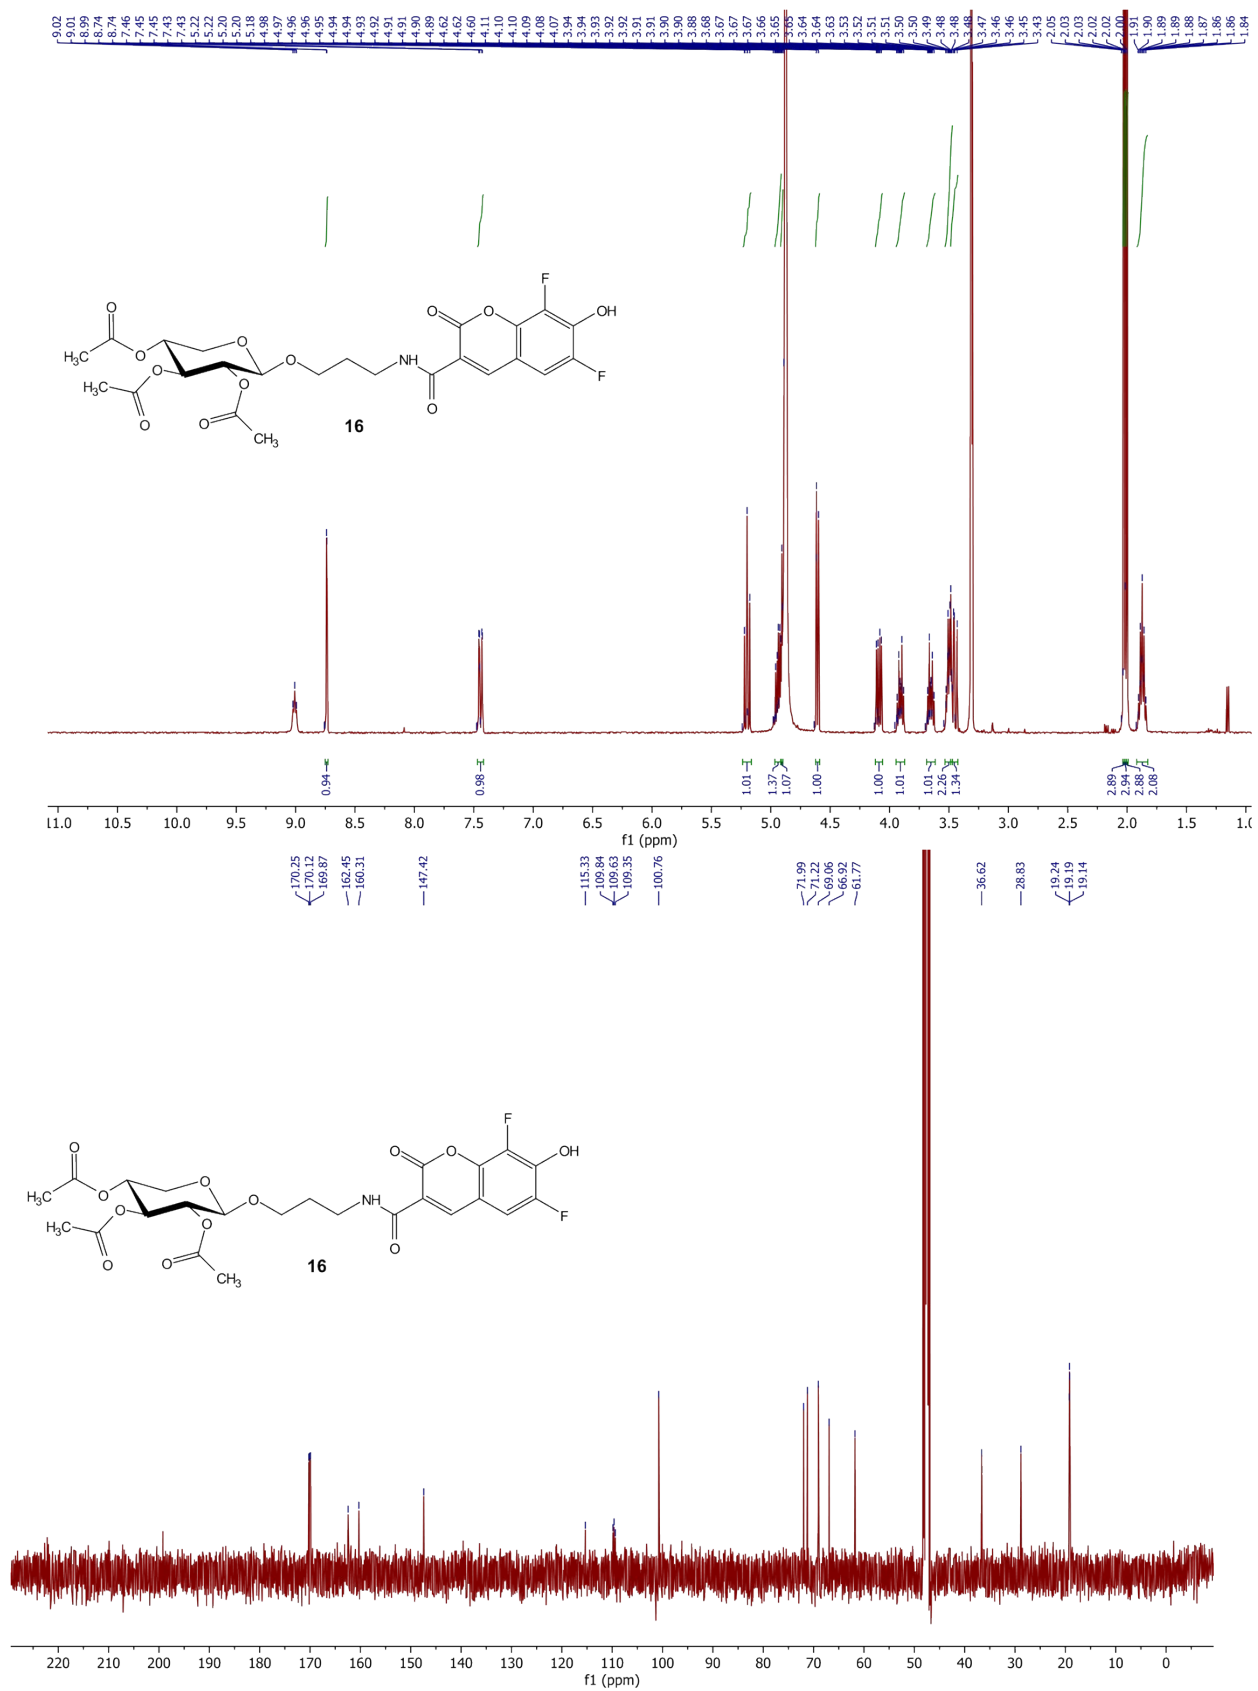

Figure S15 – <sup>1</sup>H and <sup>13</sup>C spectrum for compound 16

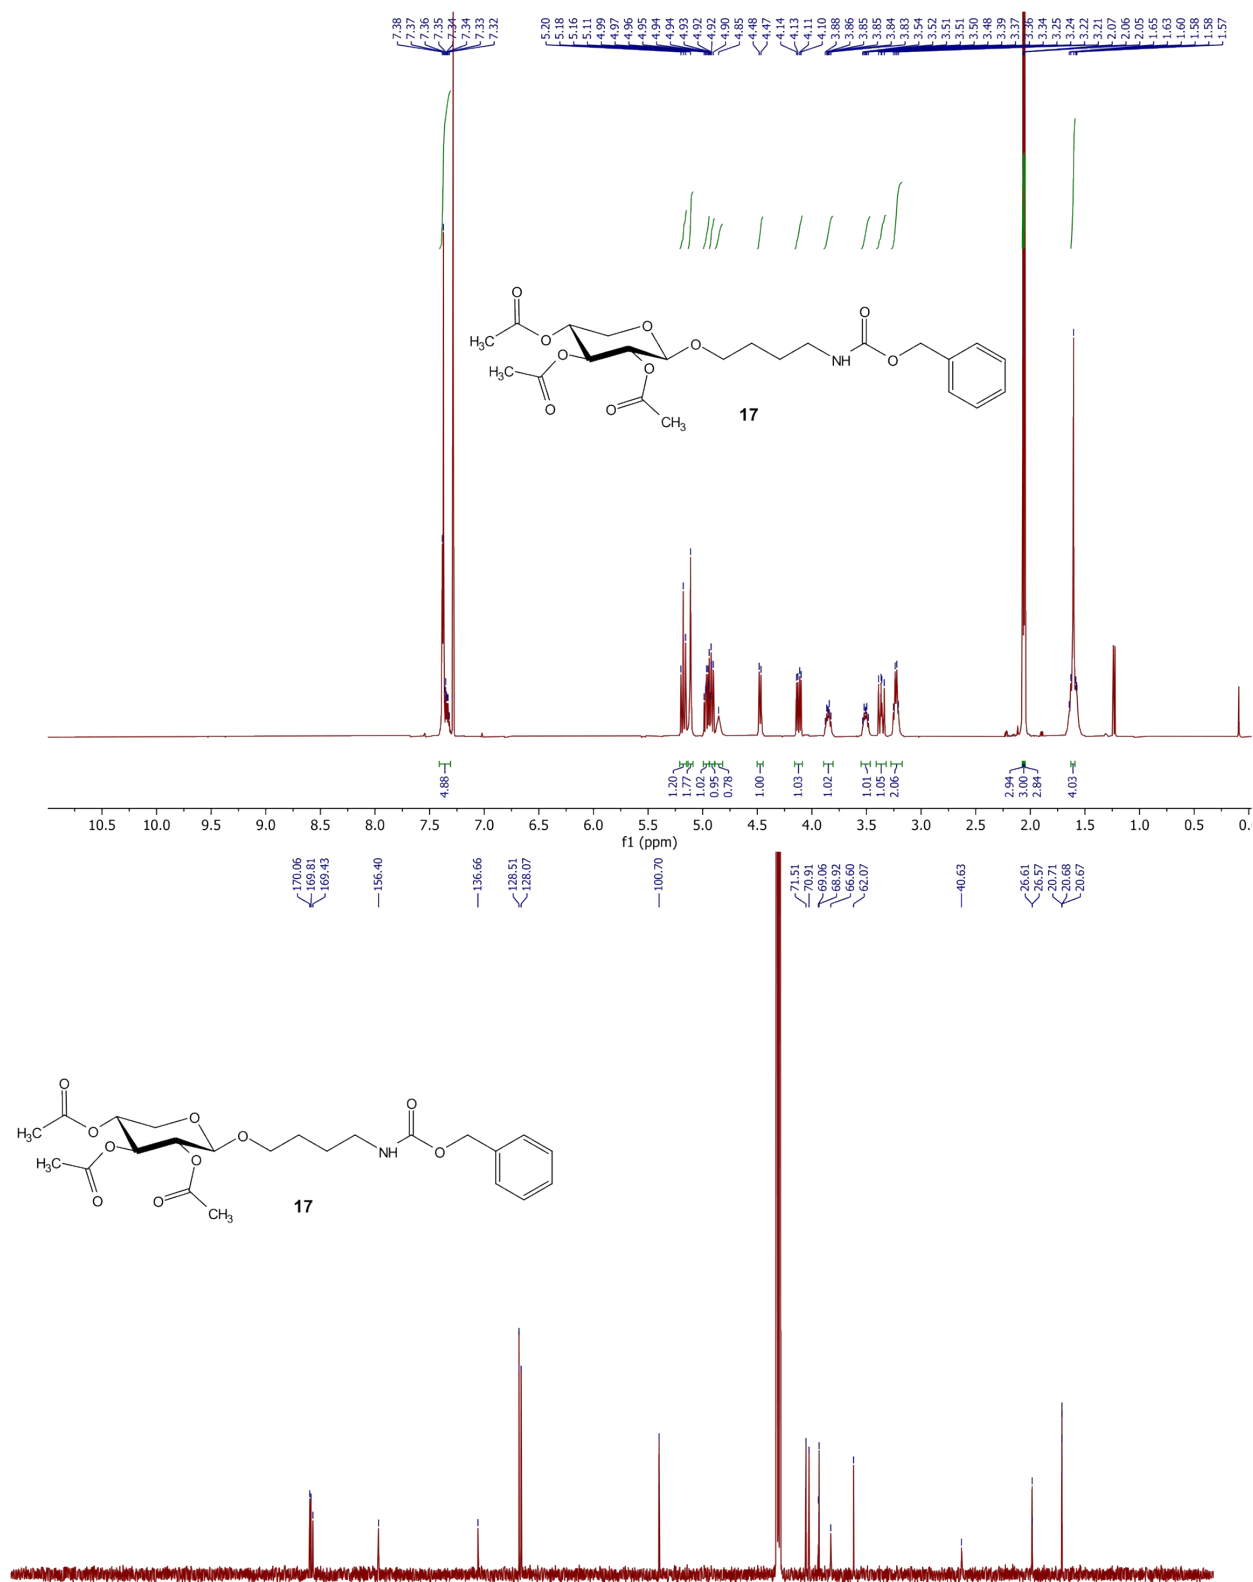

Figure S16 – <sup>1</sup>H and <sup>13</sup>C spectrum for compound 17

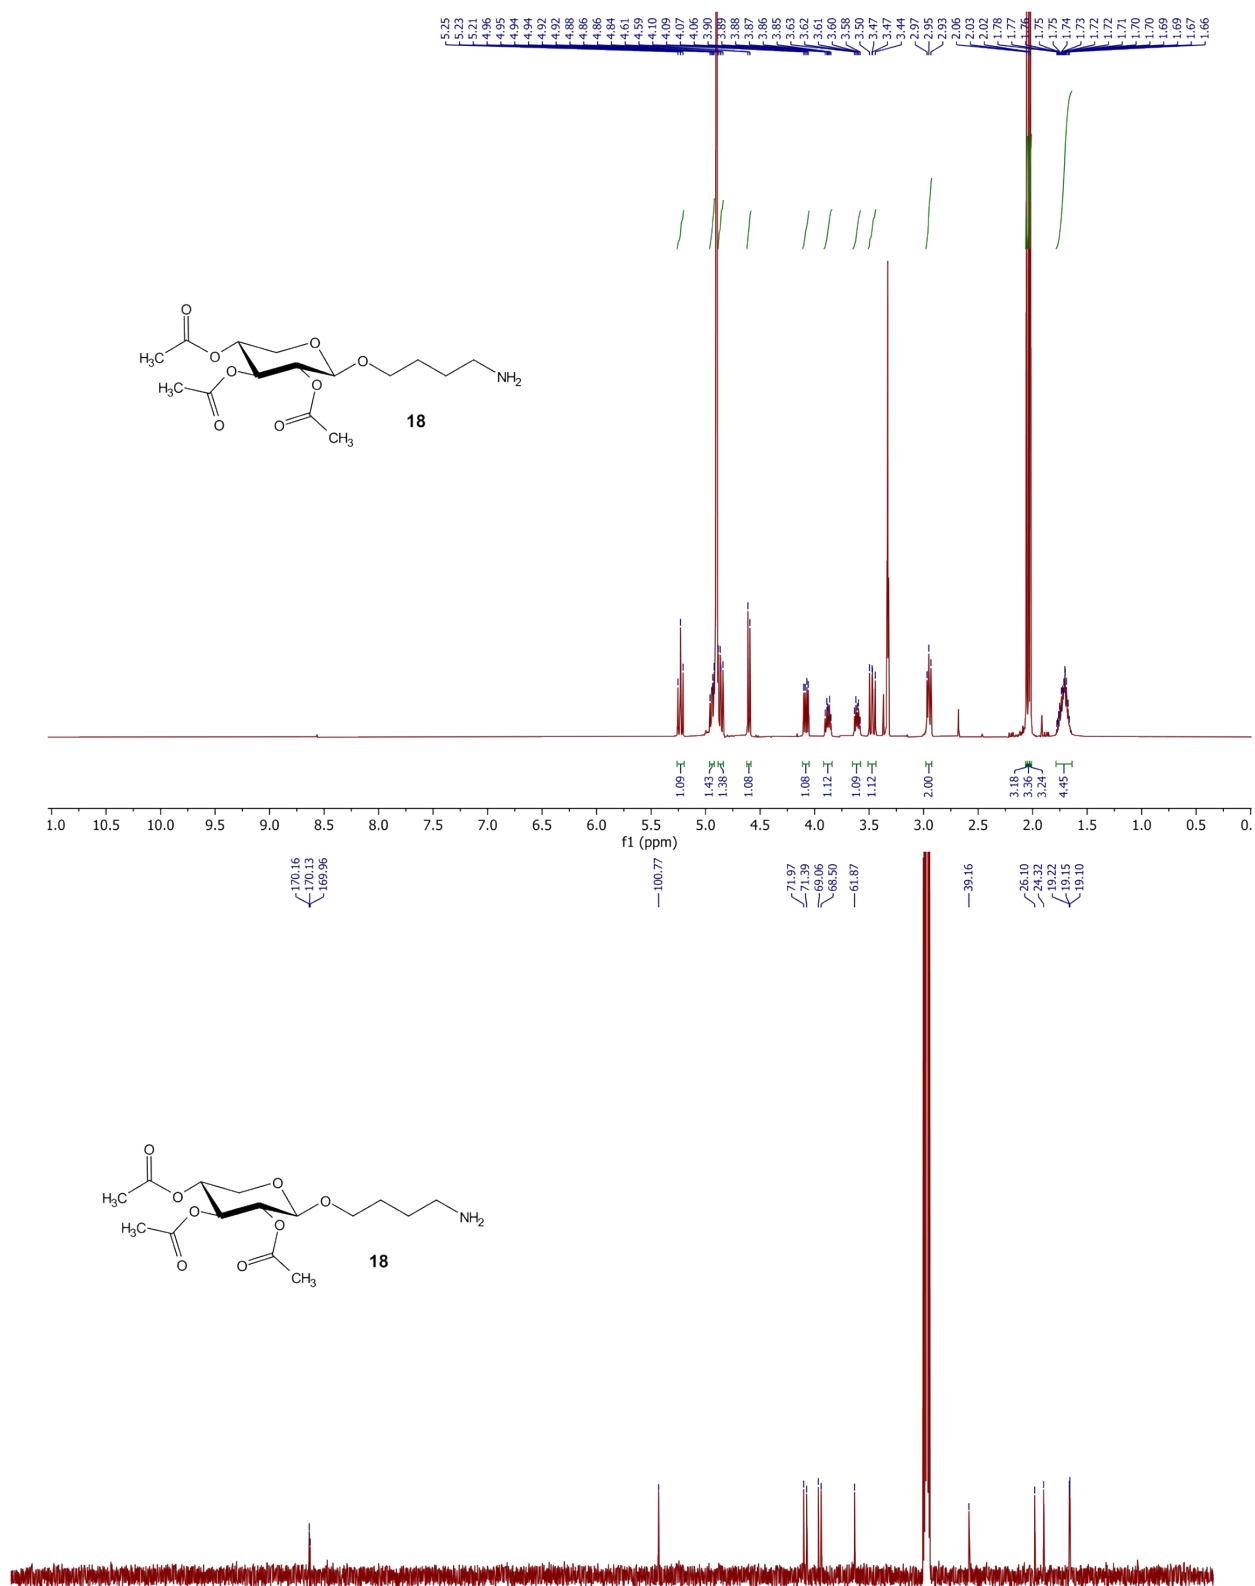

Figure S17– <sup>1</sup>H and <sup>13</sup>C spectrum for compound 18



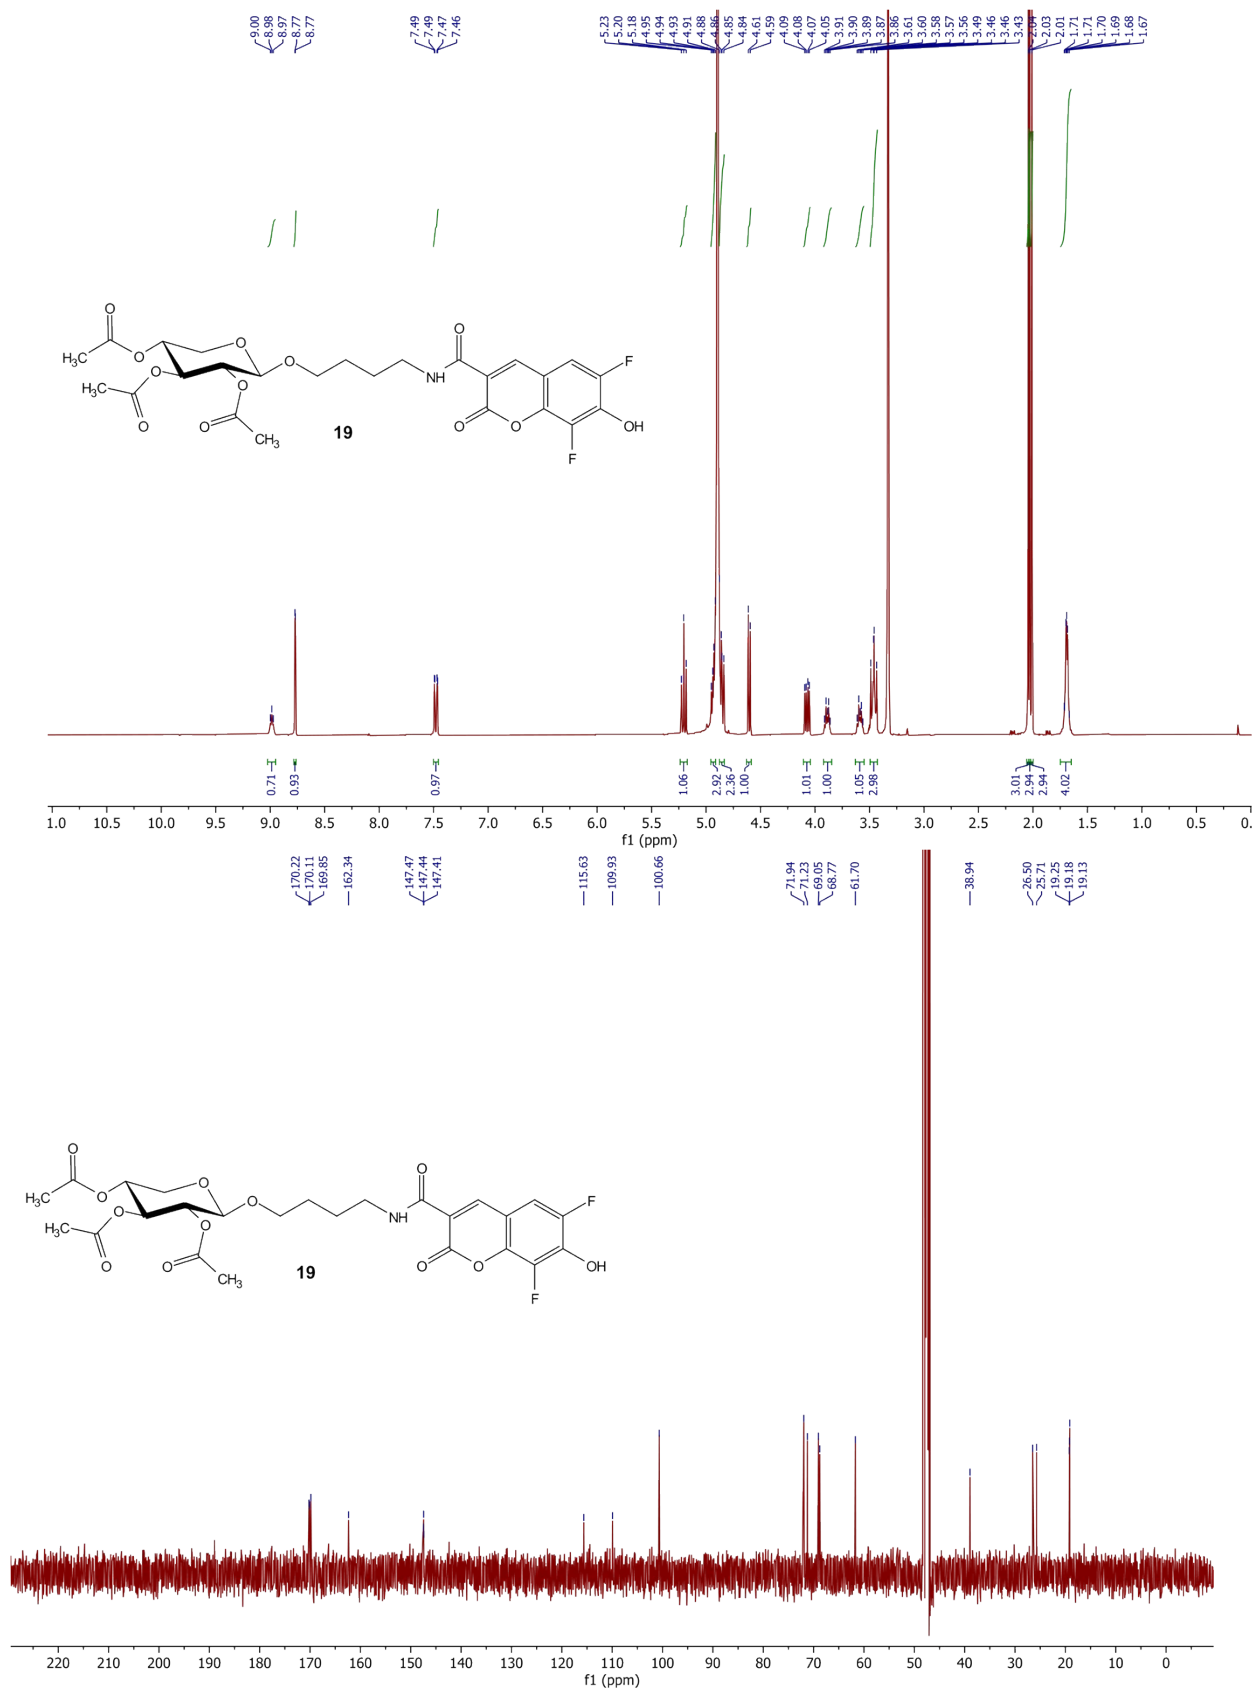

Figure S18– <sup>1</sup>H and <sup>13</sup>C spectrum for compound 19

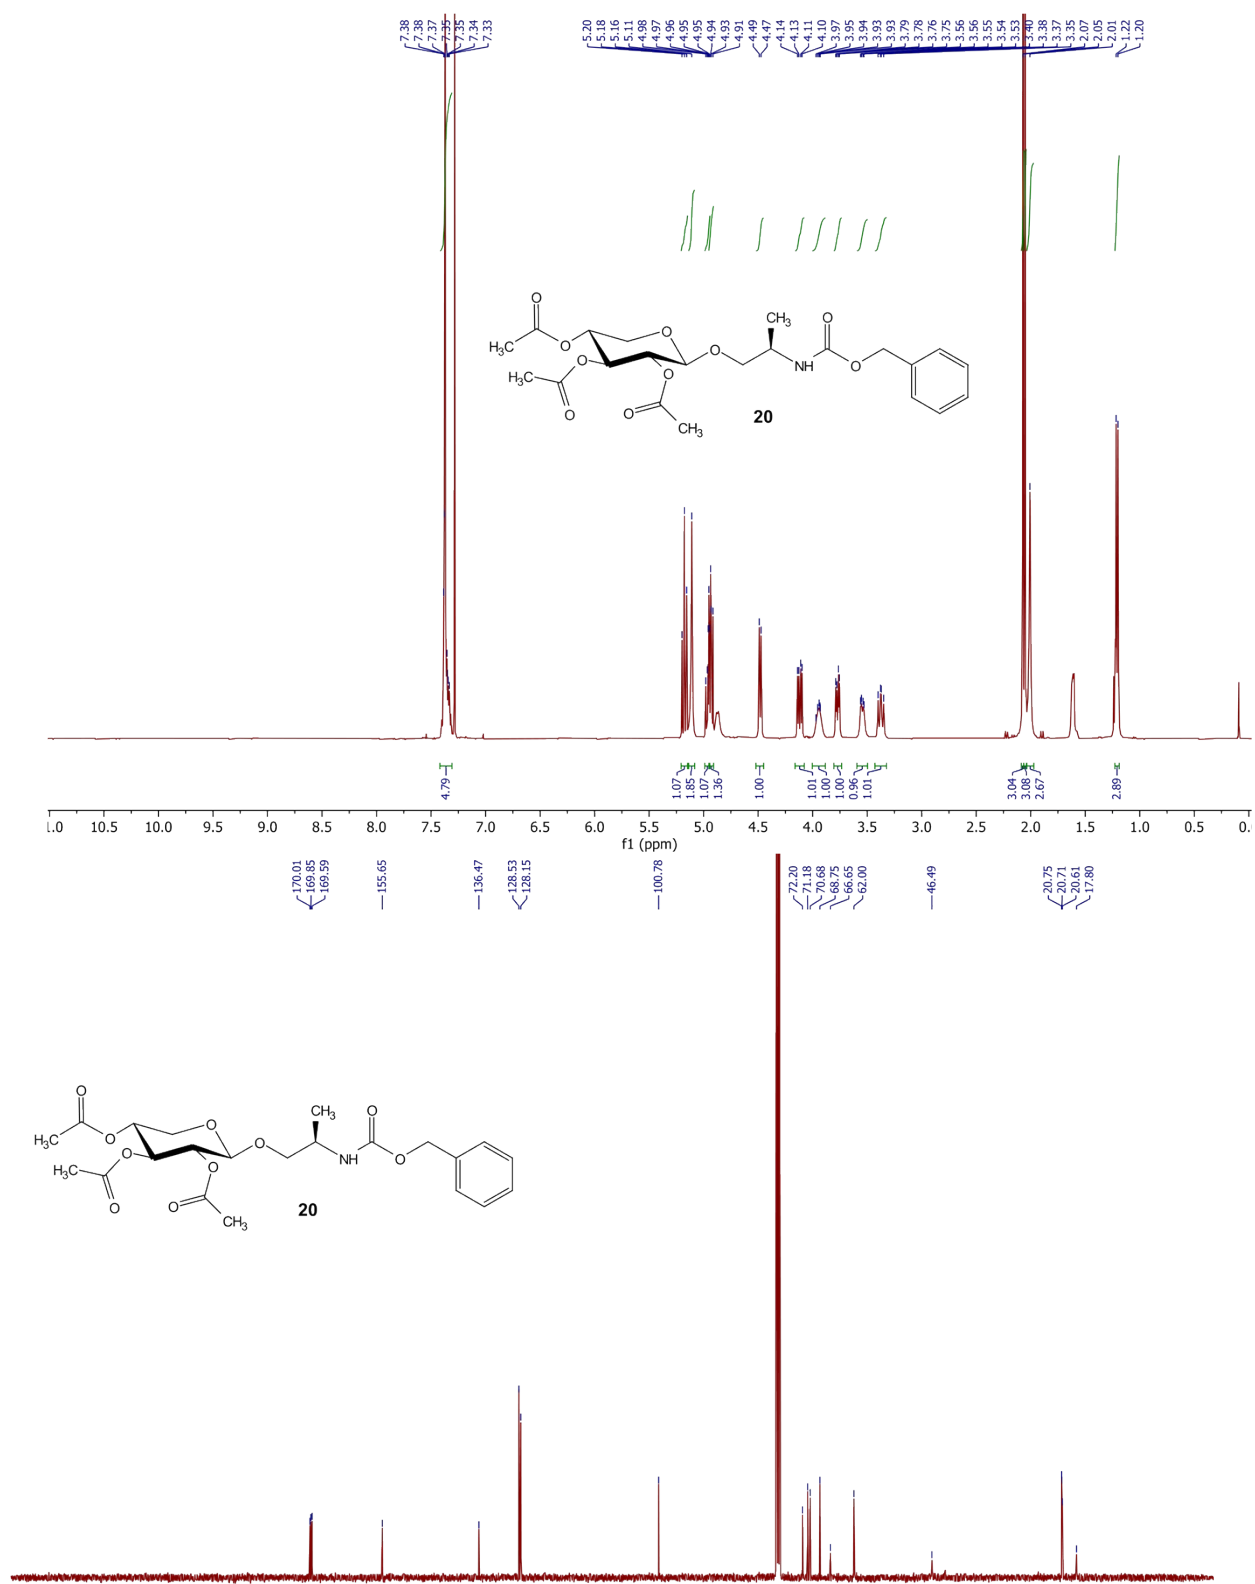

Figure S19 – <sup>1</sup>H and <sup>13</sup>C spectrum for compound 20

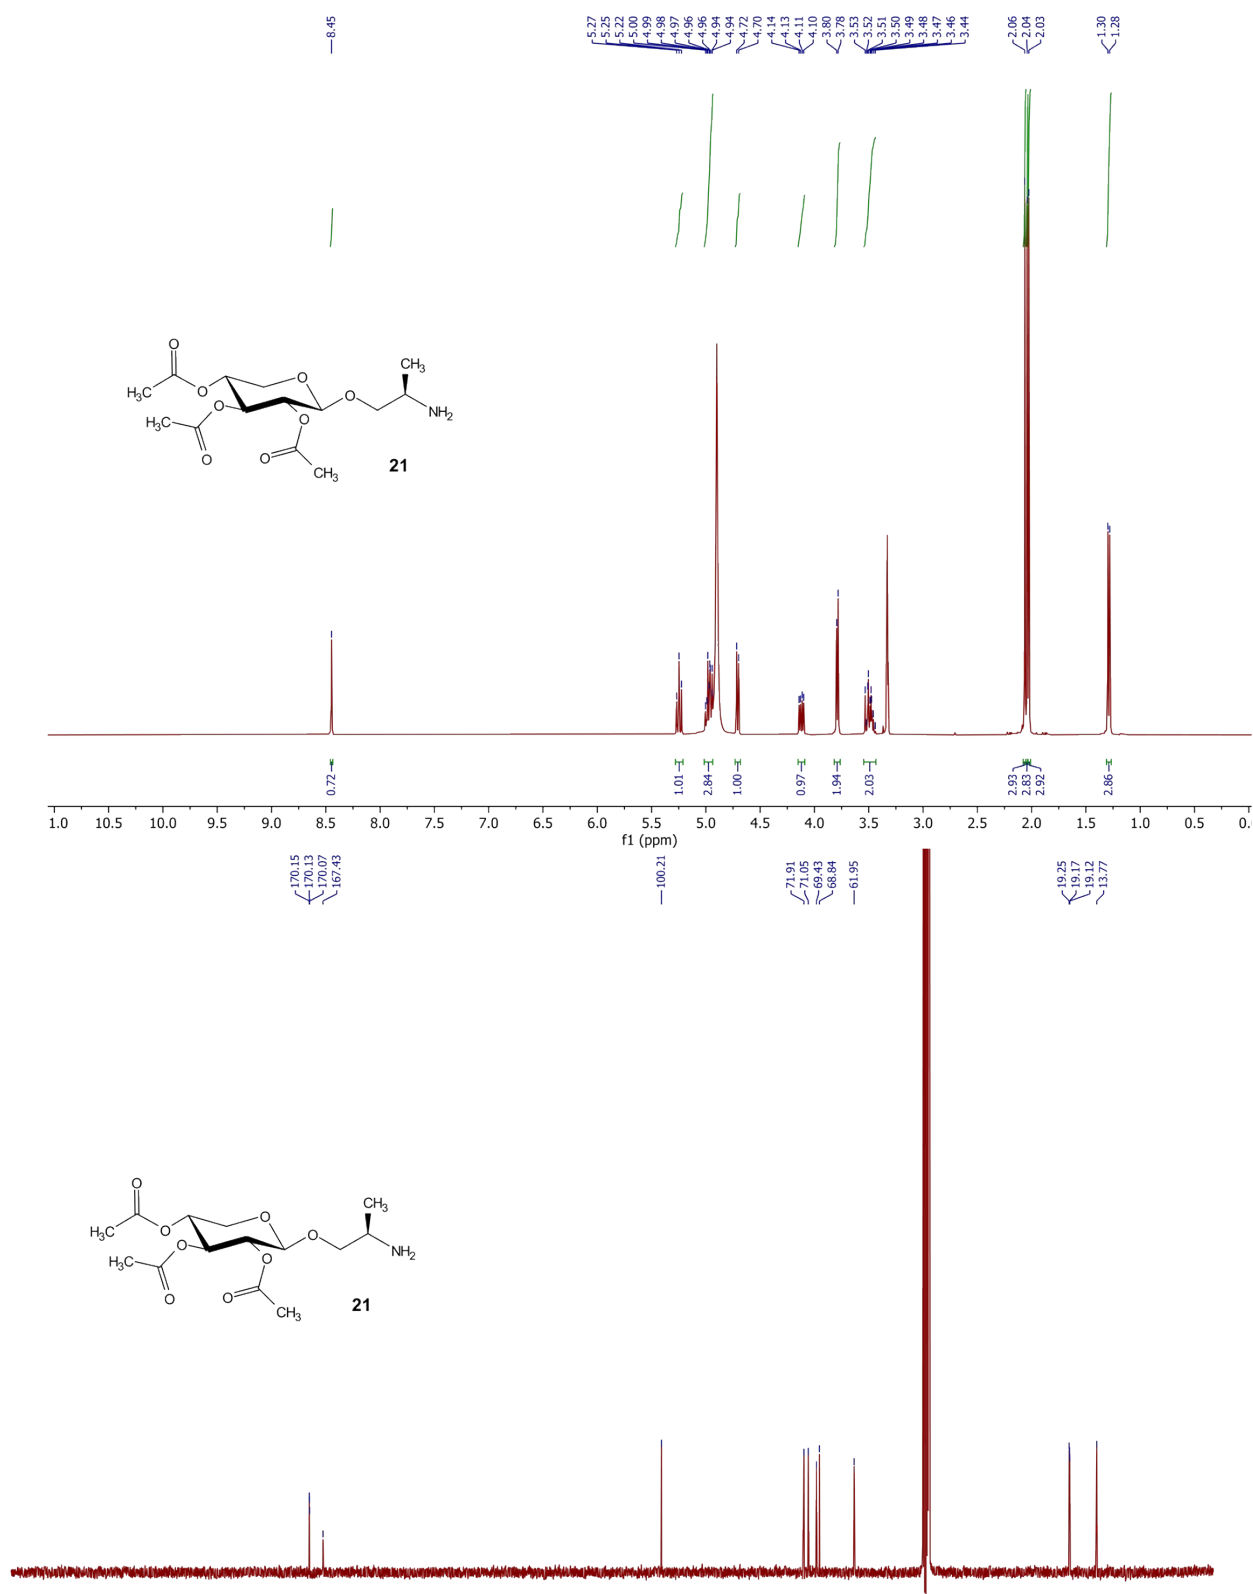

Figure S20 – <sup>1</sup>H and <sup>13</sup>C spectrum for compound **21**

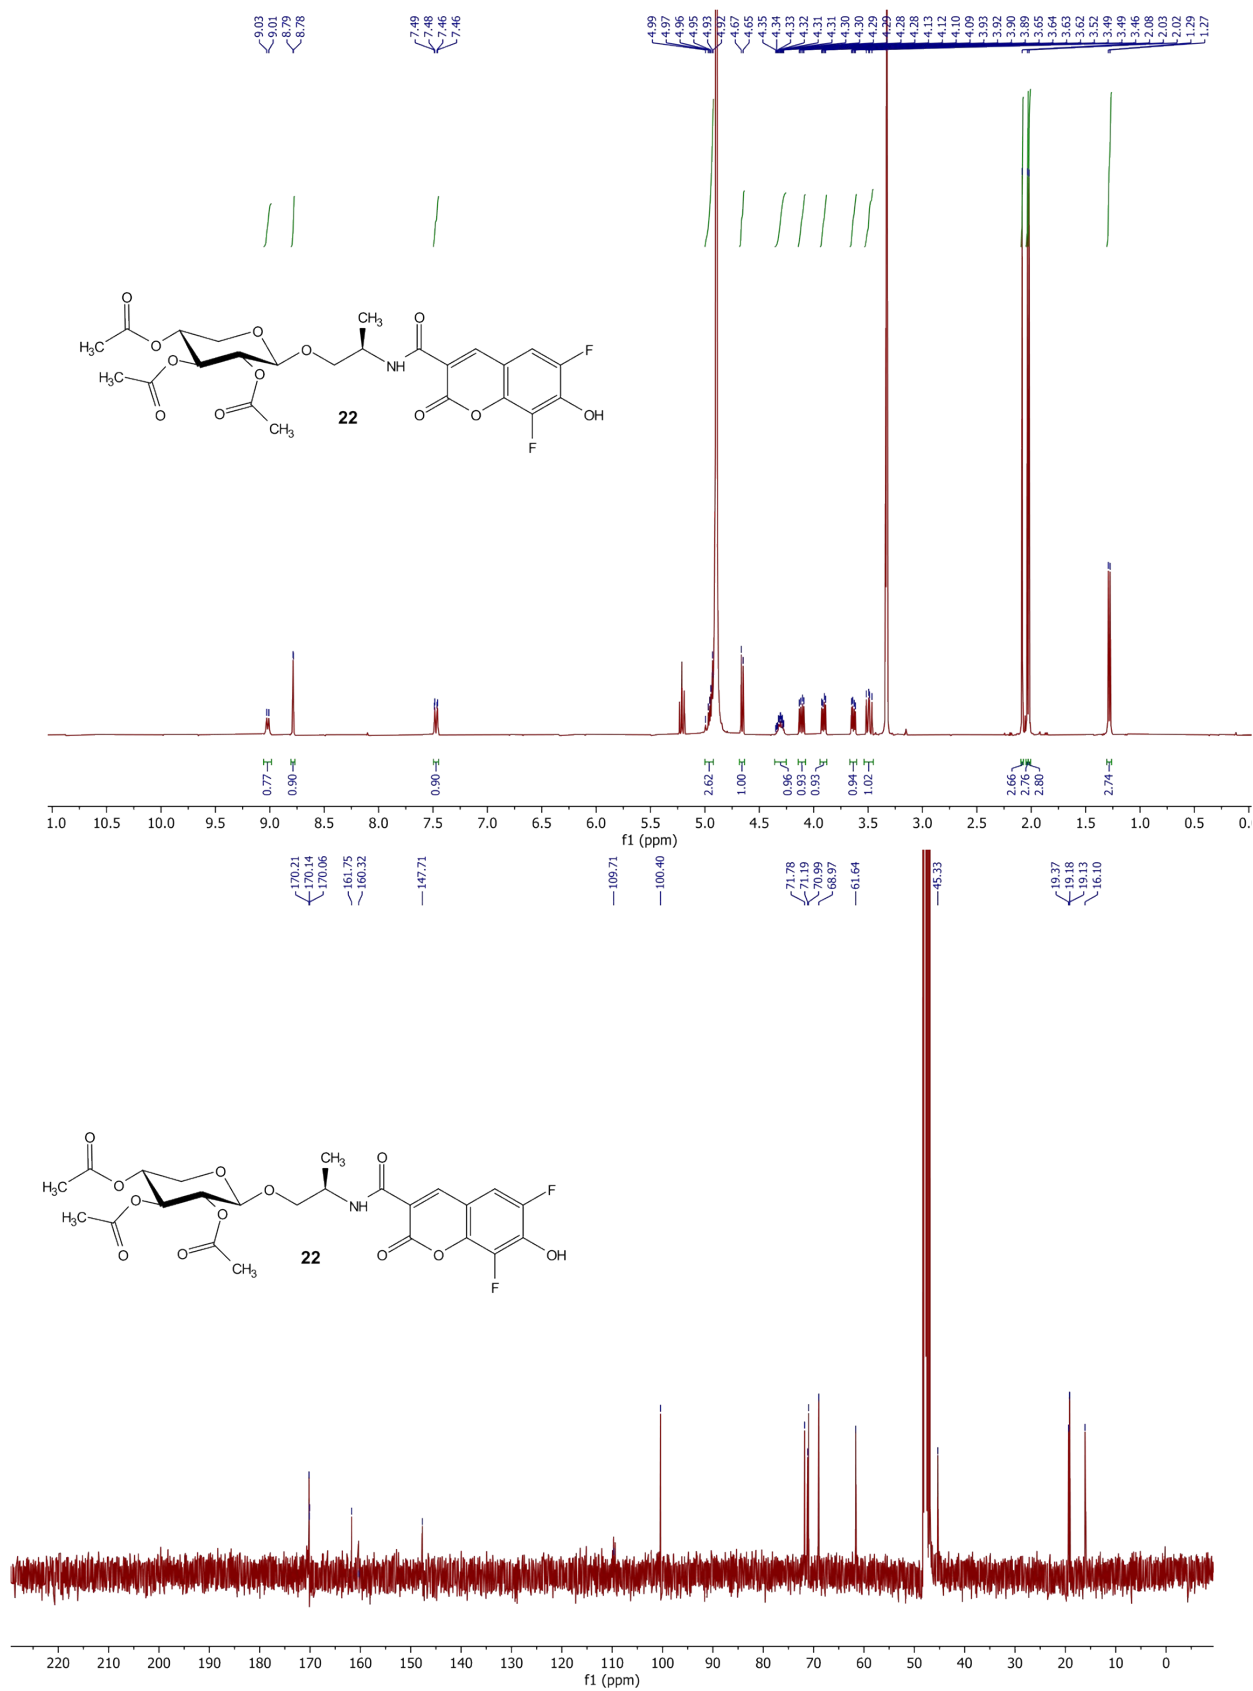

Figure S21 –  $^1\text{H}$  and  $^{13}\text{C}$  spectrum for compound **22**

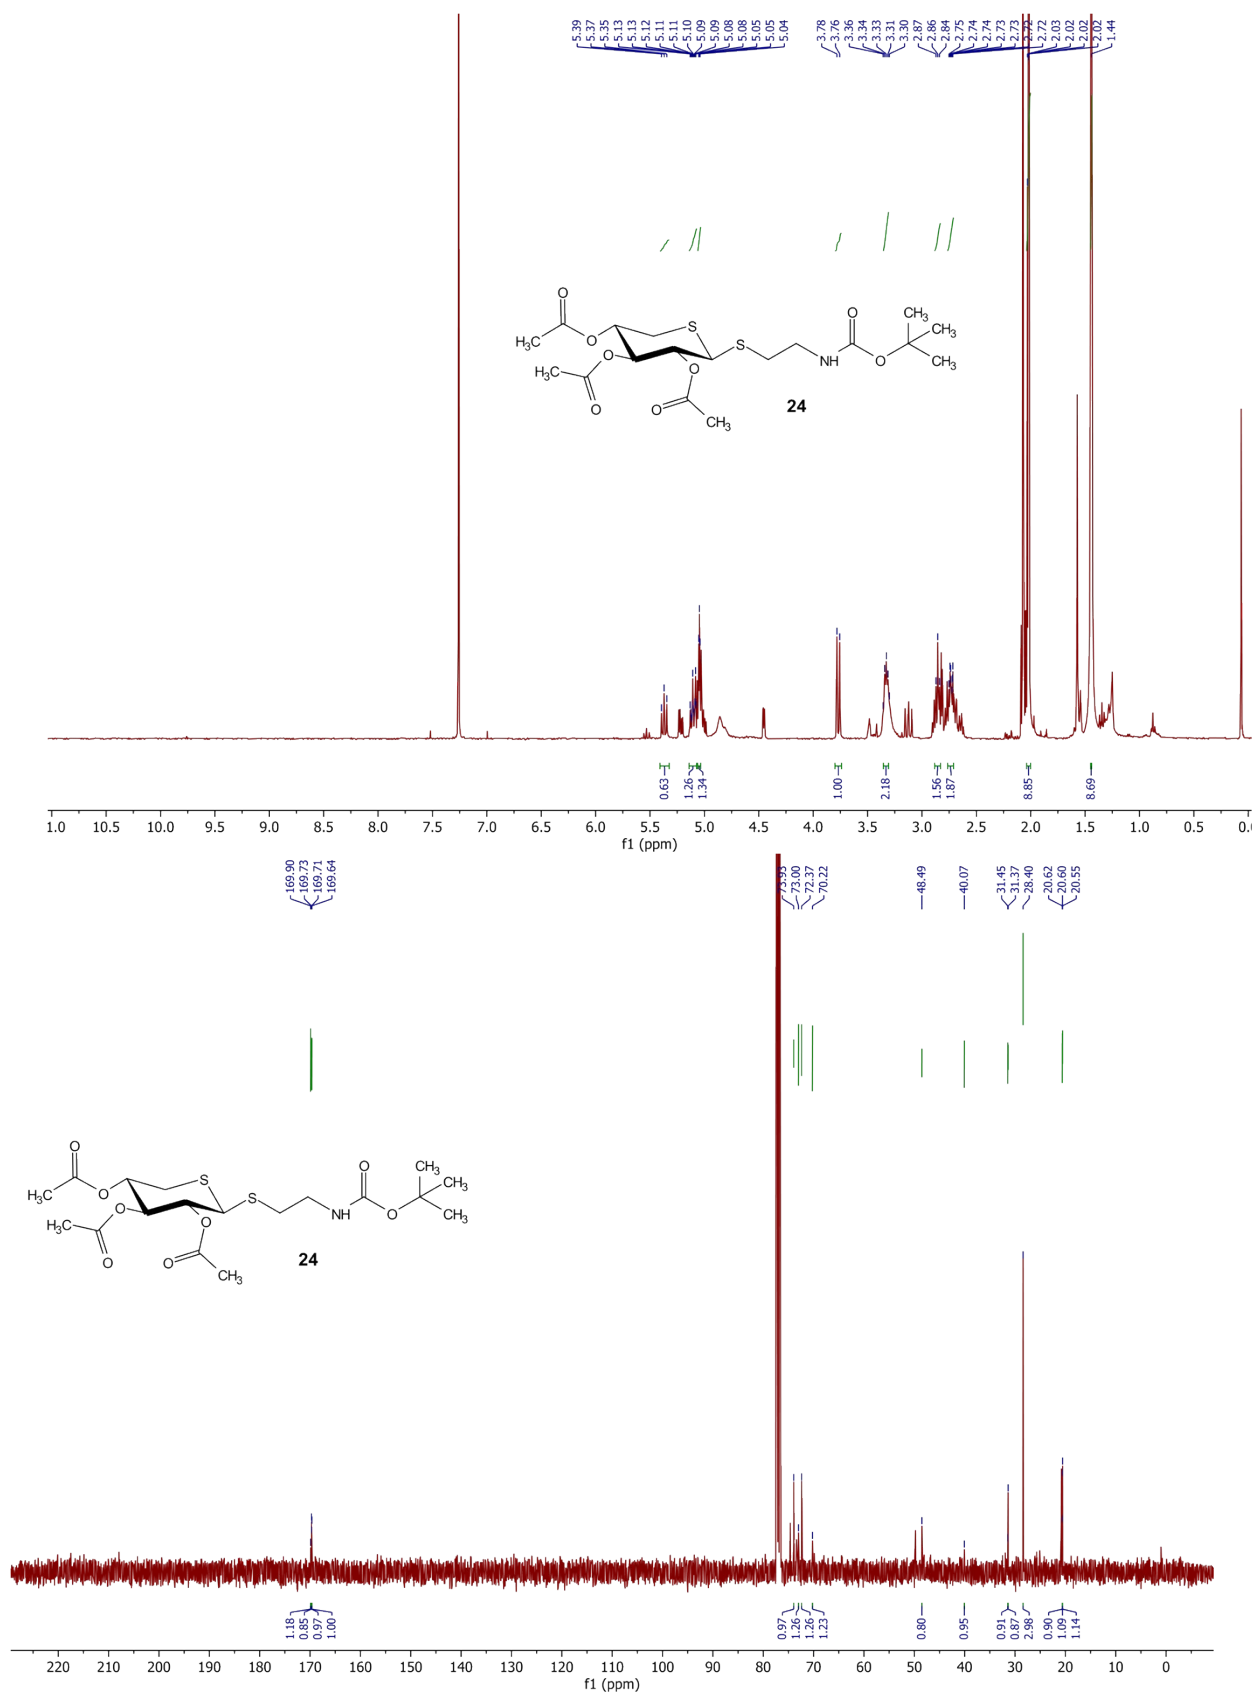

Figure S22 – <sup>1</sup>H and <sup>13</sup>C spectrum for compound 24

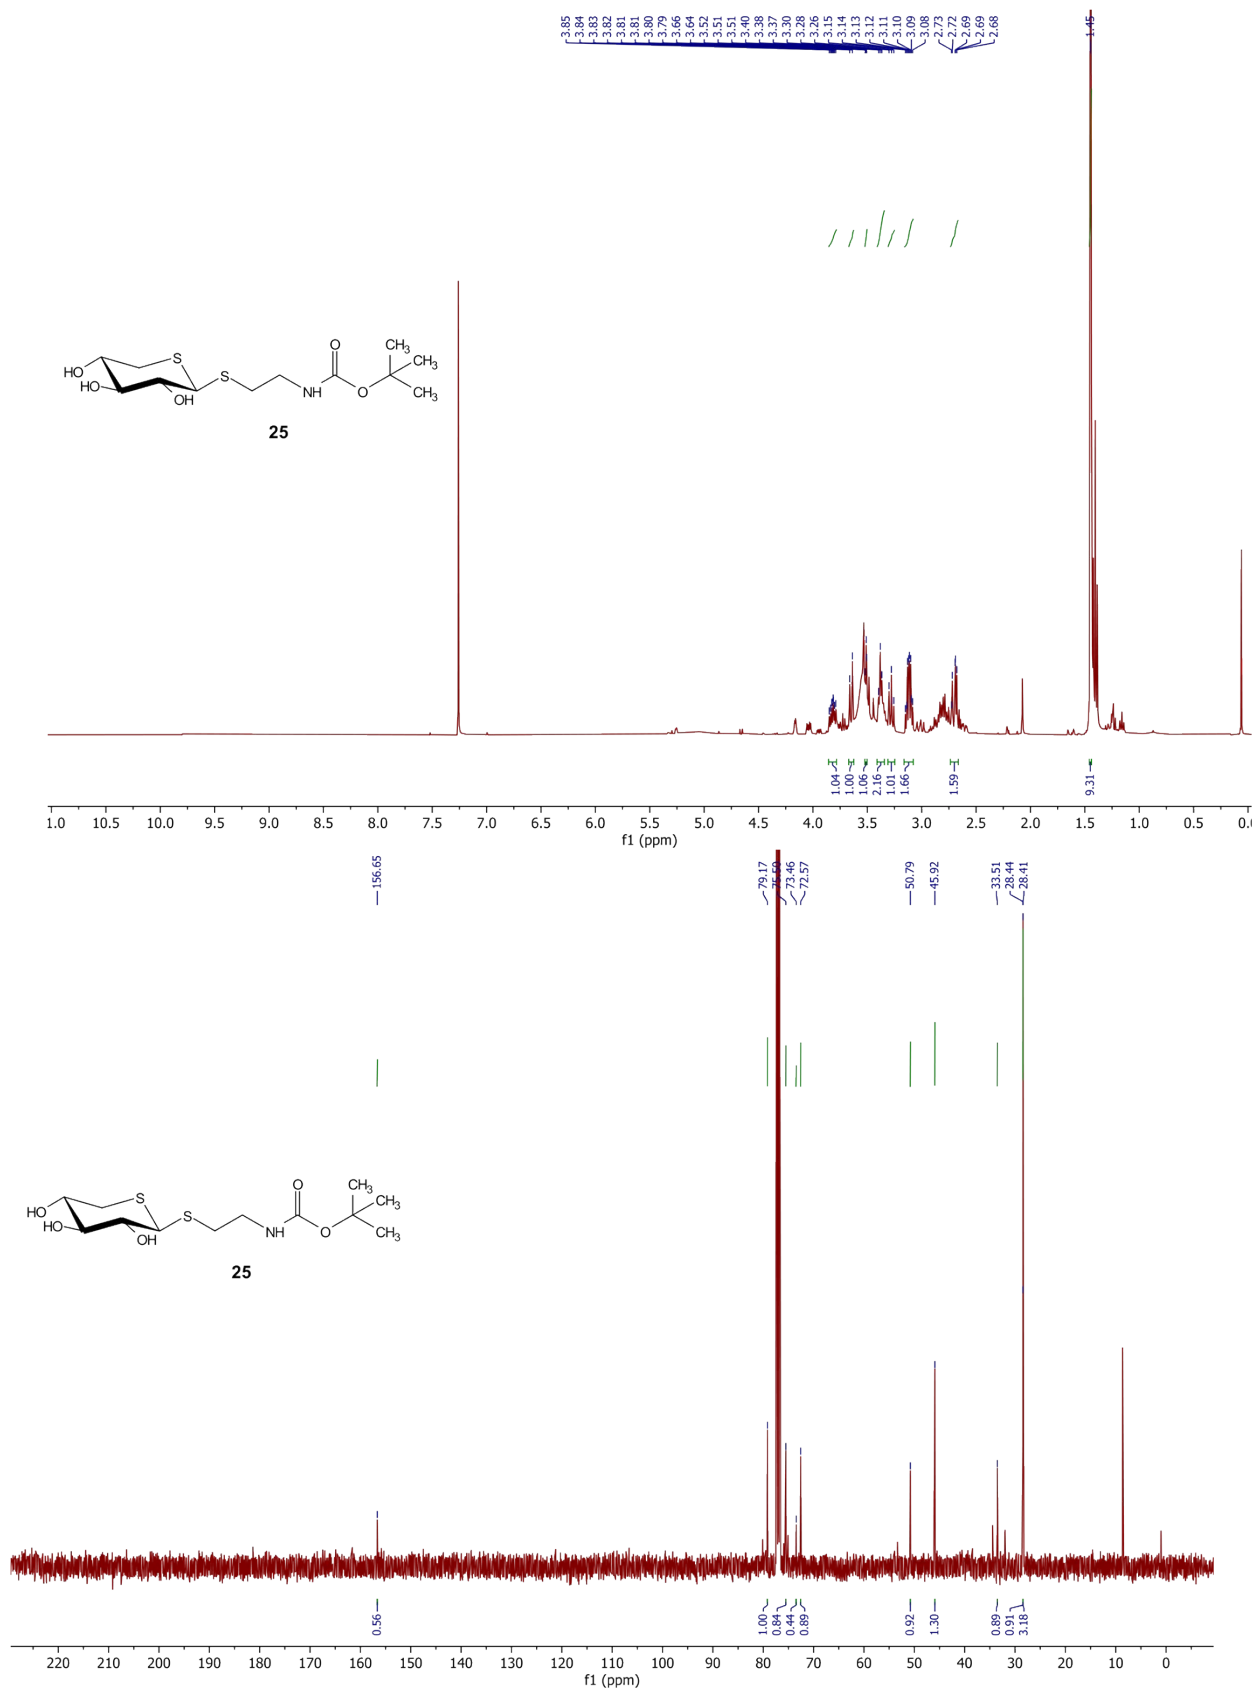

Figure S23 – <sup>1</sup>H and <sup>13</sup>C spectrum for compound 25

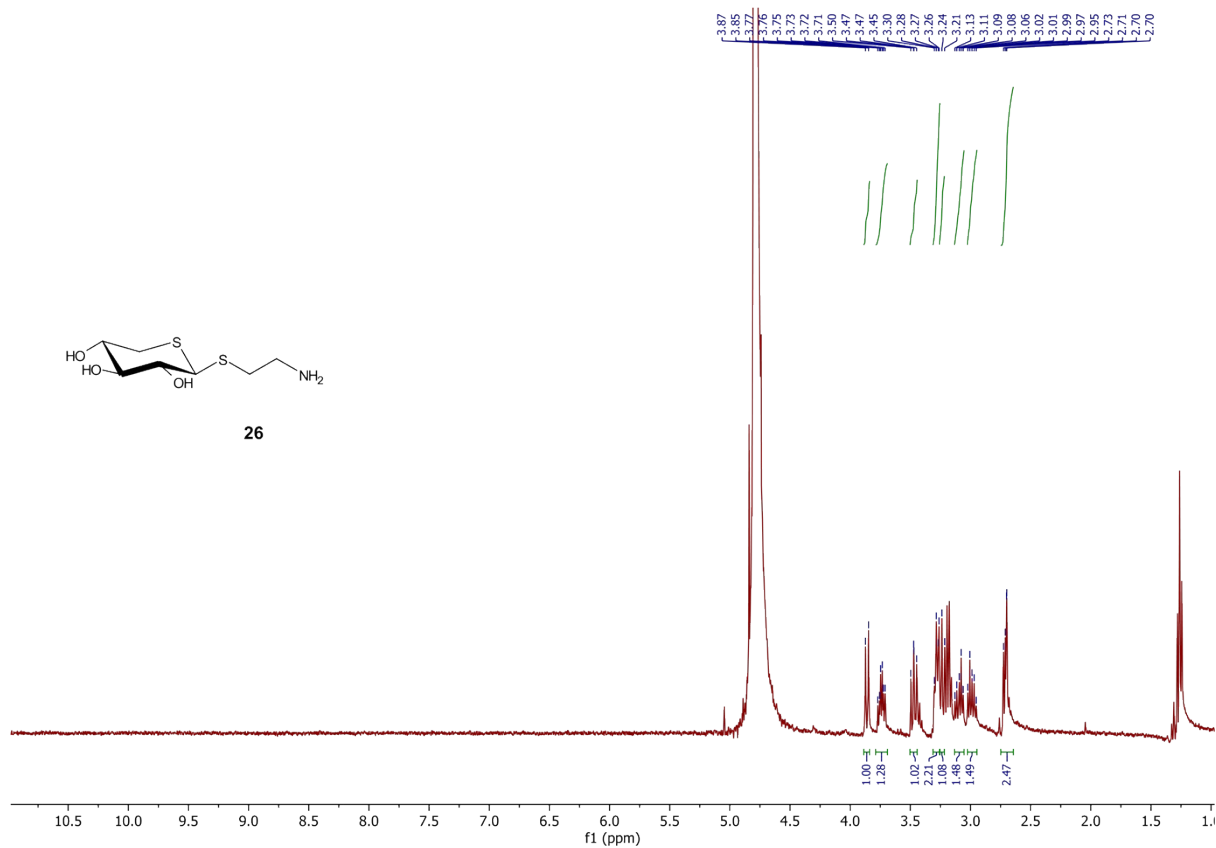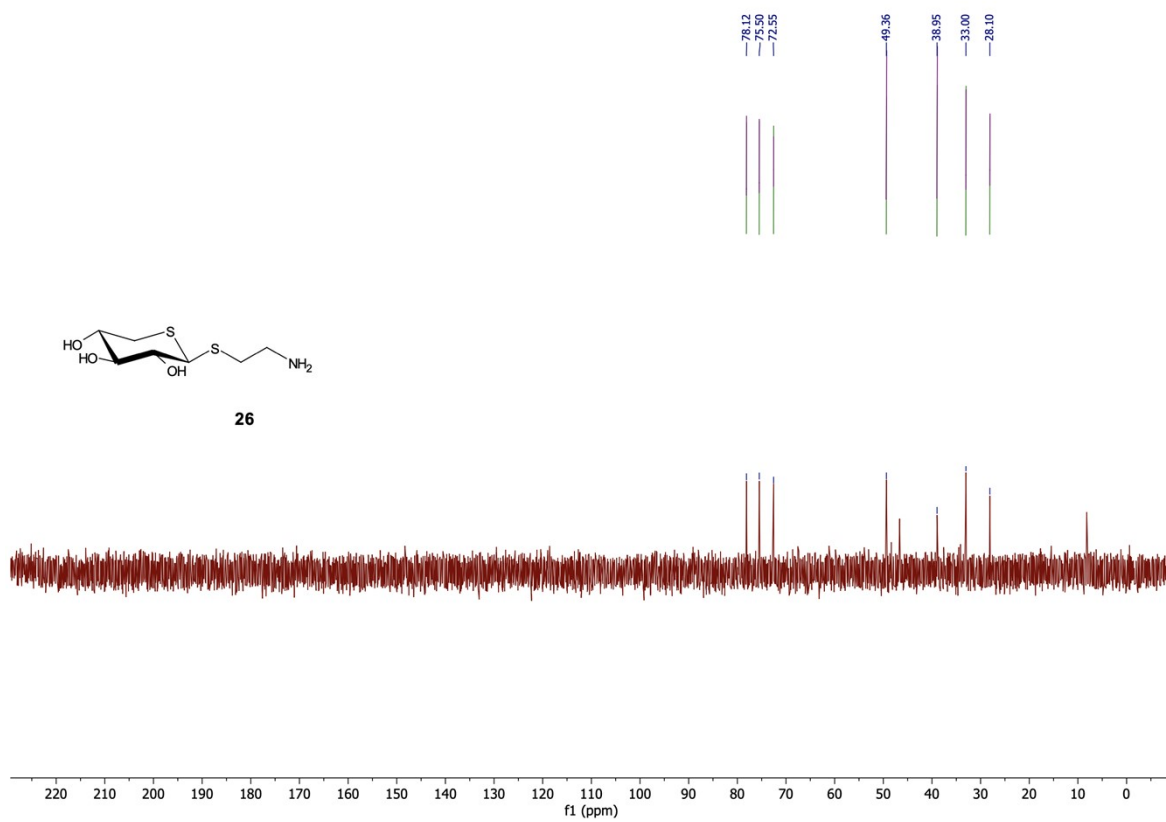

Figure S24 –  $^1\text{H}$  and  $^{13}\text{C}$  spectrum for compound 26
